# Supplementary material for: Structure and characteristics of the plant-frugivore bird network from the Guilin Botanical Garden
Source: PeerJ. 2023 Mar 16;11:e15028. doi: 10.7717/peerj.15028 (PMC10024898; doi:10.7717/peerj.15028)
Supplement: Supplemental Information 1 [file peerj-11-15028-s001.xlsx]

## Sheet: Feeding behavior
Month	bird species	plant species	number of bird	times	Feeding quantity
September	Copsychus saularis	Cinnamomum camphora	1	13	4
September	Parus major	Cinnamomum camphora	2	24	1
September	Ixos mcclellandii	Cinnamomum camphora	7	27	5
September	Hemixos castanonotus	Cinnamomum camphora	2	32	3
September	Copsychus saularis	Cinnamomum camphora	2	10	1
September	Ixos mcclellandii	Cinnamomum camphora	4	30	4
September	Pycnonotus xanthorrhous	Cinnamomum camphora	3	24	2
September	Pycnonotus xanthorrhous	Cinnamomum camphora	1	11	1
September	Parus major	Cinnamomum camphora	6	26	3
September	Pycnonotus xanthorrhous	Cinnamomum camphora	2	42	5
September	Pycnonotus sinensis	Cinnamomum camphora	3	16	2
September	Ixos mcclellandii	Cinnamomum camphora	2	3	1
September	Pycnonotus xanthorrhous	Cinnamomum camphora	3	14	2
September	Hemixos castanonotus	Cinnamomum camphora	8	34	2
September	Pycnonotus sinensis	Rauvolfia verticillata	1	23	1
September	Copsychus saularis	Cinnamomum camphora	2	26	2
September	Parus major	Cinnamomum camphora	6	27	2
September	Parus venustulus	Cinnamomum camphora	1	5	1
September	Pycnonotus xanthorrhous	Cinnamomum camphora	2	15	2
September	Pycnonotus xanthorrhous	Cinnamomum camphora	5	9	3
September	Hemixos castanonotus	Cinnamomum camphora	3	11	5
September	Pycnonotus sinensis	Cinnamomum camphora	3	6	1
September	Hemixos castanonotus	Cinnamomum camphora	9	37	3
September	Pycnonotus xanthorrhous	Cinnamomum camphora	1	2	1
September	Copsychus saularis	Cinnamomum camphora	1	8	1
September	Pycnonotus xanthorrhous	Cinnamomum camphora	7	12	3
September	Ixos mcclellandii	Cinnamomum camphora	2	3	1
September	Zosterops japonicus	Cinnamomum camphora	3	22	2
September	Parus major	Cinnamomum camphora	8	29	3
September	Pycnonotus xanthorrhous	Rauvolfia verticillata	3	13	1
September	Pycnonotus sinensis	Rauvolfia verticillata	1	6	1
September	Copsychus saularis	Cinnamomum camphora	2	8	1
September	Pycnonotus sinensis	Cinnamomum camphora	1	14	1
September	Hemixos castanonotus	Cinnamomum camphora	3	13	6
September	Parus venustulus	Cinnamomum camphora	2	15	1
September	Pycnonotus xanthorrhous	Cinnamomum camphora	1	4	1
September	Pycnonotus xanthorrhous	Cinnamomum camphora	2	31	1
September	Parus major	Cinnamomum camphora	6	5	3
September	Copsychus saularis	Cinnamomum camphora	3	11	1
September	Pycnonotus xanthorrhous	Cinnamomum camphora	4	5	2
September	Ixos mcclellandii	Cinnamomum camphora	5	10	3
September	Parus major	Cinnamomum camphora	2	43	1
September	Pycnonotus sinensis	Cinnamomum camphora	1	13	1
September	Parus venustulus	Cinnamomum camphora	1	16	2
September	Urocissa erythrorhyncha	Cinnamomum camphora	7	8	2
September	Pycnonotus sinensis	Cinnamomum camphora	2	35	2
September	Ixos mcclellandii	Cinnamomum camphora	2	23	1
September	Parus major	Cinnamomum camphora	4	16	3
September	Pycnonotus sinensis	Cinnamomum camphora	12	25	3
September	Zosterops japonicus	Cinnamomum camphora	6	17	3
September	Pycnonotus jocosus	Cinnamomum camphora	3	43	2
September	Pycnonotus xanthorrhous	Cinnamomum camphora	5	32	3
September	Hemixos castanonotus	Cinnamomum camphora	2	14	2
September	Parus major	Cinnamomum camphora	9	37	3
September	Ixos mcclellandii	Cinnamomum camphora	4	9	1
September	Pycnonotus xanthorrhous	Cinnamomum camphora	2	26	1
September	Pycnonotus sinensis	Cinnamomum camphora	3	3	2
September	Ixos mcclellandii	Cinnamomum camphora	3	14	2
September	Copsychus saularis	Cinnamomum camphora	2	3	1
September	Pycnonotus xanthorrhous	Cinnamomum camphora	1	23	1
September	Hemixos castanonotus	Magnolia grandiflora	2	27	2
September	Parus major	Cinnamomum camphora	3	5	2
September	Parus major	Cinnamomum camphora	2	2	1
September	Urocissa erythrorhyncha	Cinnamomum camphora	6	13	4
September	Pycnonotus xanthorrhous	Cinnamomum camphora	2	7	3
September	Pycnonotus sinensis	Cinnamomum camphora	1	3	1
September	Pycnonotus jocosus	Cinnamomum camphora	2	2	1
September	Ixos mcclellandii	Cinnamomum camphora	5	16	2
September	Parus major	Cinnamomum camphora	3	3	2
September	Copsychus saularis	Cinnamomum camphora	1	2	1
September	Parus venustulus	Cinnamomum camphora	4	22	1
September	Pycnonotus xanthorrhous	Rauvolfia verticillata	2	9	3
September	Hemixos castanonotus	Cinnamomum camphora	3	5	2
September	Ixos mcclellandii	Cinnamomum camphora	9	31	6
September	Pycnonotus xanthorrhous	Rauvolfia verticillata	6	46	7
September	Parus major	Cinnamomum camphora	13	19	4
September	Parus venustulus	Cinnamomum camphora	8	15	2
September	Copsychus saularis	Cinnamomum camphora	3	4	1
September	Pycnonotus sinensis	Cinnamomum camphora	9	17	3
September	Pycnonotus xanthorrhous	Cinnamomum camphora	4	24	2
September	Pycnonotus sinensis	Cinnamomum camphora	3	7	2
September	Ixos mcclellandii	Rauvolfia verticillata	3	26	5
September	Copsychus saularis	Cinnamomum camphora	2	5	1
September	Pycnonotus sinensis	Rauvolfia verticillata	2	7	2
September	Pycnonotus xanthorrhous	Cinnamomum camphora	6	14	1
September	Hemixos castanonotus	Cinnamomum camphora	3	11	2
September	Zosterops japonicus	Cinnamomum camphora	7	19	3
September	Parus major	Cinnamomum camphora	6	38	3
September	Pycnonotus xanthorrhous	Cinnamomum camphora	3	25	3
September	Ixos mcclellandii	Cinnamomum camphora	2	5	2
September	Hemixos castanonotus	Cinnamomum camphora	5	13	2
September	Ixos mcclellandii	Rauvolfia verticillata	2	18	4
September	Pycnonotus xanthorrhous	Cinnamomum camphora	3	31	3
September	Pycnonotus sinensis	Cinnamomum camphora	1	14	1
September	Parus major	Cinnamomum camphora	5	22	2
September	Pycnonotus xanthorrhous	Cinnamomum camphora	3	14	2
September	Urocissa erythrorhyncha	Cinnamomum camphora	5	27	5
September	Ixos mcclellandii	Cinnamomum camphora	3	16	2
September	Parus major	Cinnamomum camphora	4	6	1
September	Pycnonotus sinensis	Cinnamomum camphora	2	18	2
September	Pycnonotus jocosus	Cinnamomum camphora	3	7	1
September	Pycnonotus xanthorrhous	Rauvolfia verticillata	4	13	3
September	Hemixos castanonotus	Rauvolfia verticillata	5	14	1
September	Pycnonotus jocosus	Cinnamomum camphora	5	12	2
September	Pycnonotus sinensis	Cinnamomum camphora	3	28	2
September	Zosterops japonicus	Cinnamomum camphora	5	9	2
September	Ixos mcclellandii	Cinnamomum camphora	2	21	4
September	Urocissa erythrorhyncha	Cinnamomum camphora	3	14	1
September	Pycnonotus xanthorrhous	Cinnamomum camphora	3	9	2
September	Ixos mcclellandii	Cinnamomum camphora	6	13	2
September	Ixos mcclellandii	Cinnamomum camphora	4	10	3
September	Parus major	Cinnamomum camphora	8	8	2
September	Parus major	Cinnamomum camphora	4	18	1
September	Hemixos castanonotus	Cinnamomum camphora	2	7	1
September	Pycnonotus xanthorrhous	Cinnamomum camphora	3	34	5
September	Hemixos castanonotus	Cinnamomum camphora	5	21	2
September	Parus major	Cinnamomum camphora	2	11	2
September	Ixos mcclellandii	Cinnamomum camphora	3	19	1
September	Pycnonotus sinensis	Cinnamomum camphora	4	5	1
September	Pycnonotus xanthorrhous	Cinnamomum camphora	2	17	2
September	Ixos mcclellandii	Cinnamomum camphora	2	6	1
September	Parus major	Cinnamomum camphora	1	15	2
September	Zosterops japonicus	Cinnamomum camphora	3	9	2
October	Pycnonotus xanthorrhous	Cayratia japonica	3	8	2
October	Zosterops japonicus	Cayratia japonica	6	24	4
October	Pycnonotus sinensis	Cayratia japonica	2	13	1
October	Urocissa erythrorhyncha	Cayratia japonica	4	9	2
October	Hemixos castanonotus	Cayratia japonica	5	12	2
October	Zosterops japonicus	Cayratia japonica	3	34	6
October	Zosterops japonicus	Cayratia japonica	5	9	1
October	Hemixos castanonotus	Cayratia japonica	4	15	2
October	Pycnonotus sinensis	Cayratia japonica	2	5	1
October	Zosterops japonicus	Cayratia japonica	5	21	2
October	Zosterops japonicus	Cayratia japonica	2	14	2
October	Pycnonotus sinensis	Cayratia japonica	1	24	5
October	Pycnonotus xanthorrhous	Cayratia japonica	1	4	1
October	Pycnonotus xanthorrhous	Cayratia japonica	4	20	4
October	Pycnonotus xanthorrhous	Cayratia japonica	2	19	2
October	Pycnonotus sinensis	Cayratia japonica	1	28	2
October	Zosterops japonicus	Cayratia japonica	6	42	3
October	Hemixos castanonotus	Cayratia japonica	4	12	2
October	Urocissa erythrorhyncha	Cayratia japonica	2	17	3
October	Zosterops japonicus	Cayratia japonica	3	5	2
October	Pycnonotus xanthorrhous	Cayratia japonica	2	11	3
October	Pycnonotus sinensis	Cayratia japonica	2	9	1
October	Zosterops japonicus	Cayratia japonica	4	11	2
October	Ixos mcclellandii	Cayratia japonica	3	2	1
October	Ixos mcclellandii	Cayratia japonica	2	5	1
October	Pycnonotus xanthorrhous	Cayratia japonica	2	24	2
October	Hemixos castanonotus	Cayratia japonica	2	17	3
October	Pycnonotus xanthorrhous	Cayratia japonica	4	23	5
October	Pycnonotus sinensis	Cayratia japonica	1	5	1
October	Zosterops japonicus	Cayratia japonica	5	13	2
October	Pycnonotus xanthorrhous	Cayratia japonica	3	7	1
October	Pycnonotus xanthorrhous	Cayratia japonica	1	4	4
October	Pycnonotus xanthorrhous	Cayratia japonica	2	17	2
October	Zosterops japonicus	Cayratia japonica	4	24	4
October	Zosterops japonicus	Cayratia japonica	3	7	2
October	Ixos mcclellandii	Cayratia japonica	5	26	3
October	Pycnonotus sinensis	Cayratia japonica	1	5	3
October	Zosterops japonicus	Cayratia japonica	2	7	2
October	Hemixos castanonotus	Cayratia japonica	2	14	1
October	Pycnonotus sinensis	Cayratia japonica	2	11	2
October	Parus venustulus	Cayratia japonica	5	13	1
October	Urocissa erythrorhyncha	Cayratia japonica	2	10	2
October	Pycnonotus sinensis	Cayratia japonica	3	8	1
October	Pycnonotus xanthorrhous	Cayratia japonica	2	18	2
October	Zosterops japonicus	Cayratia japonica	6	5	4
October	Zosterops japonicus	Cayratia japonica	3	34	2
October	Zosterops japonicus	Cayratia japonica	4	21	3
October	Pycnonotus sinensis	Cayratia japonica	2	11	2
October	Parus venustulus	Cayratia japonica	3	11	2
October	Pycnonotus xanthorrhous	Cayratia japonica	5	22	1
October	Pycnonotus xanthorrhous	Cayratia japonica	2	15	3
October	Parus venustulus	Cayratia japonica	3	7	2
October	Ixos mcclellandii	Cayratia japonica	2	6	2
October	Pycnonotus xanthorrhous	Cayratia japonica	4	23	5
October	Zosterops japonicus	Cayratia japonica	2	12	3
October	Pycnonotus sinensis	Cayratia japonica	5	3	2
October	Zosterops japonicus	Cayratia japonica	3	18	3
October	Zosterops japonicus	Cayratia japonica	5	31	5
October	Parus venustulus	Cayratia japonica	2	14	1
October	Ixos mcclellandii	Cayratia japonica	4	22	3
October	Pycnonotus sinensis	Cayratia japonica	3	14	2
October	Ixos mcclellandii	Cayratia japonica	6	27	4
October	Ixos mcclellandii	Cayratia japonica	2	16	2
October	Zosterops japonicus	Cayratia japonica	2	6	2
October	Pycnonotus sinensis	Cayratia japonica	3	18	3
October	Zosterops japonicus	Cayratia japonica	2	8	1
October	Pycnonotus xanthorrhous	Cayratia japonica	5	4	1
October	Pycnonotus xanthorrhous	Cayratia japonica	2	13	3
October	Hemixos castanonotus	Cayratia japonica	2	8	3
October	Urocissa erythrorhyncha	Cayratia japonica	1	23	3
October	Pycnonotus xanthorrhous	Cayratia japonica	2	14	3
October	Pycnonotus sinensis	Cayratia japonica	3	4	1
October	Turdus merula	Cayratia japonica	3	3	1
October	Zosterops japonicus	Cayratia japonica	7	7	3
October	Zosterops japonicus	Cayratia japonica	2	31	3
October	Urocissa erythrorhyncha	Cayratia japonica	3	24	2
October	Hemixos castanonotus	Cayratia japonica	2	21	3
October	Zosterops japonicus	Cayratia japonica	3	18	3
October	Pycnonotus xanthorrhous	Cayratia japonica	2	5	1
October	Pycnonotus xanthorrhous	Cayratia japonica	1	11	2
October	Pycnonotus xanthorrhous	Cayratia japonica	4	32	5
October	Turdus merula	Cayratia japonica	3	8	1
October	Zosterops japonicus	Cayratia japonica	6	47	8
October	Pycnonotus sinensis	Cayratia japonica	3	22	1
October	Hemixos castanonotus	Cayratia japonica	5	9	2
October	Pycnonotus sinensis	Cayratia japonica	1	17	1
October	Zosterops japonicus	Cayratia japonica	8	24	4
October	Pycnonotus xanthorrhous	Cayratia japonica	1	7	1
October	Pycnonotus sinensis	Cayratia japonica	2	24	3
October	Hemixos castanonotus	Cayratia japonica	4	6	1
October	Ixos mcclellandii	Cayratia japonica	2	7	2
October	Hemixos castanonotus	Cayratia japonica	2	14	2
October	Pycnonotus sinensis	Cayratia japonica	1	11	4
October	Zosterops japonicus	Cayratia japonica	3	19	3
October	Pycnonotus xanthorrhous	Cayratia japonica	3	38	5
October	Pycnonotus xanthorrhous	Cayratia japonica	2	25	2
October	Pycnonotus xanthorrhous	Cayratia japonica	2	5	1
October	Zosterops japonicus	Cayratia japonica	4	13	5
October	Zosterops japonicus	Cayratia japonica	2	18	5
October	Hemixos castanonotus	Cayratia japonica	4	31	2
October	Pycnonotus sinensis	Cayratia japonica	3	24	2
October	Pycnonotus xanthorrhous	Cayratia japonica	6	5	1
October	Pycnonotus sinensis	Cayratia japonica	5	15	1
October	Urocissa erythrorhyncha	Cayratia japonica	3	33	2
October	Ixos mcclellandii	Cayratia japonica	5	14	1
October	Zosterops japonicus	Cayratia japonica	7	15	2
October	Pycnonotus xanthorrhous	Cayratia japonica	3	7	2
October	Pycnonotus xanthorrhous	Cayratia japonica	5	23	2
October	Ixos mcclellandii	Cayratia japonica	2	32	3
October	Pycnonotus xanthorrhous	Cayratia japonica	3	15	1
October	Parus major	Cayratia japonica	3	7	1
October	Hemixos castanonotus	Cayratia japonica	4	6	2
October	Hemixos castanonotus	Cayratia japonica	5	21	3
October	Pycnonotus sinensis	Cayratia japonica	2	23	2
October	Pycnonotus xanthorrhous	Cayratia japonica	2	4	1
October	Pycnonotus xanthorrhous	Cayratia japonica	5	43	3
October	Parus major	Cayratia japonica	3	25	2
October	Pycnonotus xanthorrhous	Cayratia japonica	8	37	3
October	Ixos mcclellandii	Cayratia japonica	5	21	1
October	Ixos mcclellandii	Cayratia japonica	2	33	1
October	Ixos mcclellandii	Cayratia japonica	2	7	2
October	Pycnonotus xanthorrhous	Cayratia japonica	3	13	3
October	Urocissa erythrorhyncha	Cayratia japonica	2	27	6
October	Zosterops japonicus	Cayratia japonica	6	24	3
October	Hemixos castanonotus	Cayratia japonica	4	14	2
October	Pycnonotus sinensis	Cayratia japonica	3	28	3
October	Ixos mcclellandii	Cayratia japonica	2	4	2
October	Zosterops japonicus	Cayratia japonica	2	11	2
October	Zosterops japonicus	Cayratia japonica	5	26	4
October	Pycnonotus xanthorrhous	Cinnamomum camphora	6	8	2
October	Copsychus saularis	Cinnamomum camphora	1	23	4
October	Pycnonotus xanthorrhous	Cayratia japonica	1	12	2
October	Hemixos castanonotus	Cinnamomum camphora	3	22	3
October	Parus major	Cinnamomum camphora	1	23	3
October	Ixos mcclellandii	Cinnamomum camphora	2	15	2
October	Copsychus saularis	Cinnamomum camphora	3	3	1
October	Parus major	Cinnamomum camphora	5	45	5
October	Pycnonotus xanthorrhous	Cinnamomum camphora	1	32	1
October	Zosterops japonicus	Cayratia japonica	1	14	3
October	Pycnonotus xanthorrhous	Cayratia japonica	2	5	1
October	Pycnonotus xanthorrhous	Cinnamomum camphora	1	41	2
October	Ixos mcclellandii	Cinnamomum camphora	5	15	4
October	Zosterops japonicus	Cinnamomum camphora	8	32	3
October	Hemixos castanonotus	Cinnamomum camphora	4	10	3
October	Pycnonotus xanthorrhous	Cinnamomum camphora	12	8	2
October	Pycnonotus sinensis	Cinnamomum camphora	3	11	2
October	Hemixos castanonotus	Cinnamomum camphora	2	18	1
October	Pycnonotus xanthorrhous	Cinnamomum camphora	1	21	3
October	Parus major	Cinnamomum camphora	2	28	2
October	Pycnonotus xanthorrhous	Cayratia japonica	1	5	2
October	Zosterops japonicus	Cayratia japonica	1	9	2
October	Parus major	Cayratia japonica	1	17	3
October	Pycnonotus xanthorrhous	Cinnamomum camphora	2	3	2
October	Ixos mcclellandii	Cinnamomum camphora	2	25	2
October	Zosterops japonicus	Cinnamomum camphora	7	15	3
October	Hemixos castanonotus	Rauvolfia verticillata	3	26	4
October	Pycnonotus xanthorrhous	Rauvolfia verticillata	4	8	7
October	Pycnonotus sinensis	Rauvolfia verticillata	2	34	2
October	Hemixos castanonotus	Cinnamomum camphora	5	25	2
October	Pycnonotus xanthorrhous	Cinnamomum camphora	6	43	6
October	Parus major	Cinnamomum camphora	3	8	1
October	Pycnonotus sinensis	Cayratia japonica	1	11	1
October	Pycnonotus xanthorrhous	Cinnamomum camphora	3	7	2
October	Zosterops japonicus	Cinnamomum camphora	4	12	2
October	Pycnonotus xanthorrhous	Cinnamomum camphora	1	14	5
October	Copsychus saularis	Cinnamomum camphora	1	37	2
October	Pycnonotus xanthorrhous	Cinnamomum camphora	4	6	1
October	Hemixos castanonotus	Cinnamomum camphora	3	31	3
October	Turdus merula	Cinnamomum camphora	2	14	4
October	Urocissa erythrorhyncha	Cinnamomum camphora	4	48	6
October	Hemixos castanonotus	Cinnamomum camphora	3	17	3
October	Copsychus saularis	Cinnamomum camphora	2	21	3
October	Pycnonotus xanthorrhous	Cayratia japonica	5	5	2
October	Urocissa erythrorhyncha	Cayratia japonica	3	18	2
October	Hemixos castanonotus	Cinnamomum camphora	6	9	1
October	Pycnonotus sinensis	Cinnamomum camphora	2	4	2
October	Ixos mcclellandii	Cinnamomum camphora	4	34	4
October	Pycnonotus xanthorrhous	Cinnamomum camphora	2	5	3
October	Pycnonotus sinensis	Cinnamomum camphora	5	18	3
October	Zosterops japonicus	Magnolia grandiflora	4	22	2
October	Hemixos castanonotus	Cinnamomum camphora	3	31	2
October	Urocissa erythrorhyncha	Cinnamomum camphora	5	27	2
October	Zosterops japonicus	Cinnamomum camphora	4	21	2
October	Pycnonotus xanthorrhous	Cinnamomum camphora	3	15	2
October	Pycnonotus sinensis	Cinnamomum camphora	2	13	3
October	Zosterops japonicus	Cinnamomum camphora	3	9	2
October	Ixos mcclellandii	Cinnamomum camphora	5	6	2
October	Ixos mcclellandii	Cinnamomum camphora	2	5	3
October	Pycnonotus xanthorrhous	Cinnamomum camphora	3	43	5
October	Hemixos castanonotus	Cinnamomum camphora	6	27	4
October	Pycnonotus xanthorrhous	Cinnamomum camphora	3	12	2
October	Pycnonotus sinensis	Rauvolfia verticillata	5	4	2
October	Zosterops japonicus	Magnolia grandiflora	1	35	3
October	Pycnonotus xanthorrhous	Magnolia grandiflora	8	3	1
October	Pycnonotus xanthorrhous	Magnolia grandiflora	1	12	3
October	Pycnonotus xanthorrhous	Cinnamomum camphora	4	29	5
October	Urocissa erythrorhyncha	Cinnamomum camphora	2	2	1
October	Pycnonotus sinensis	Cinnamomum camphora	2	13	3
October	Zosterops japonicus	Cayratia japonica	1	7	2
October	Pycnonotus xanthorrhous	Cayratia japonica	3	2	1
October	Zosterops japonicus	Cayratia japonica	3	9	3
October	Hemixos castanonotus	Cayratia japonica	6	2	1
October	Pycnonotus xanthorrhous	Cayratia japonica	3	16	1
October	Pycnonotus xanthorrhous	Cinnamomum camphora	2	34	2
October	Parus major	Cinnamomum camphora	3	12	3
October	Urocissa erythrorhyncha	Cinnamomum camphora	6	4	1
October	Ixos mcclellandii	Cinnamomum camphora	8	3	1
October	Pycnonotus sinensis	Cinnamomum camphora	4	5	2
October	Pycnonotus xanthorrhous	Cinnamomum camphora	2	17	3
October	Pycnonotus sinensis	Cinnamomum camphora	2	6	3
October	Ixos mcclellandii	Cinnamomum camphora	3	8	3
October	Hemixos castanonotus	Cinnamomum camphora	3	8	2
October	Pycnonotus jocosus	Cinnamomum camphora	5	26	2
October	Pycnonotus xanthorrhous	Cayratia japonica	3	8	4
October	Pycnonotus sinensis	Cayratia japonica	2	36	5
October	Pycnonotus sinensis	Cayratia japonica	2	19	2
October	Pycnonotus xanthorrhous	Cayratia japonica	2	13	6
October	Hemixos castanonotus	Cayratia japonica	8	57	3
October	Pycnonotus xanthorrhous	Cayratia japonica	4	45	6
October	Pycnonotus sinensis	Cayratia japonica	1	6	3
October	Zosterops japonicus	Cayratia japonica	6	10	5
October	Zosterops japonicus	Magnolia grandiflora	4	8	3
October	Pycnonotus xanthorrhous	Rauvolfia verticillata	3	34	2
October	Hemixos castanonotus	Rauvolfia verticillata	2	5	1
October	Ixos mcclellandii	Rauvolfia verticillata	2	15	2
October	Pycnonotus xanthorrhous	Cinnamomum camphora	5	19	1
October	Pycnonotus sinensis	Cinnamomum camphora	3	8	2
October	Pycnonotus xanthorrhous	Cinnamomum camphora	1	16	3
October	Urocissa erythrorhyncha	Cinnamomum camphora	7	34	3
October	Urocissa erythrorhyncha	Cayratia japonica	2	13	1
October	Pycnonotus xanthorrhous	Cayratia japonica	6	18	2
October	Zosterops japonicus	Cayratia japonica	4	28	5
October	Pycnonotus sinensis	Cayratia japonica	3	29	4
October	Zosterops japonicus	Cayratia japonica	2	7	2
October	Hemixos castanonotus	Cayratia japonica	3	31	4
October	Hemixos castanonotus	Cayratia japonica	5	24	3
October	Pycnonotus xanthorrhous	Cinnamomum camphora	4	21	3
October	Pycnonotus xanthorrhous	Cinnamomum camphora	2	18	4
October	Pycnonotus sinensis	Cinnamomum camphora	11	4	1
October	Urocissa erythrorhyncha	Cinnamomum camphora	4	11	1
October	Parus major	Cinnamomum camphora	8	32	4
October	Ixos mcclellandii	Cinnamomum camphora	7	8	2
October	Hemixos castanonotus	Cinnamomum camphora	3	47	4
October	Pycnonotus xanthorrhous	Cinnamomum camphora	6	18	3
October	Pycnonotus sinensis	Cinnamomum camphora	3	4	1
October	Pycnonotus sinensis	Cinnamomum camphora	5	17	4
October	Zosterops japonicus	Cinnamomum camphora	2	24	2
October	Pycnonotus xanthorrhous	Cinnamomum camphora	2	7	2
October	Pycnonotus xanthorrhous	Cinnamomum camphora	7	26	3
October	Pycnonotus sinensis	Cinnamomum camphora	3	5	1
October	Hemixos castanonotus	Cinnamomum camphora	5	7	2
October	Hemixos castanonotus	Cinnamomum camphora	3	14	2
October	Zosterops japonicus	Cayratia japonica	9	11	1
October	Pycnonotus xanthorrhous	Cayratia japonica	5	19	5
October	Pycnonotus sinensis	Cayratia japonica	2	38	2
October	Hemixos castanonotus	Rauvolfia verticillata	5	25	5
October	Pycnonotus xanthorrhous	Rauvolfia verticillata	4	24	3
October	Turdus cardis	Rauvolfia verticillata	1	11	1
October	Zosterops japonicus	Magnolia grandiflora	3	7	1
October	Pycnonotus xanthorrhous	Magnolia grandiflora	2	3	2
October	Pycnonotus jocosus	Magnolia grandiflora	3	12	3
October	Pycnonotus jocosus	Magnolia grandiflora	5	27	4
October	Pycnonotus xanthorrhous	Cinnamomum camphora	8	10	1
October	Pycnonotus sinensis	Cinnamomum camphora	4	39	6
October	Hemixos castanonotus	Cinnamomum camphora	2	5	2
October	Urocissa erythrorhyncha	Cinnamomum camphora	3	6	2
October	Ixos mcclellandii	Cinnamomum camphora	4	2	1
October	Pycnonotus sinensis	Cinnamomum camphora	5	13	3
October	Pycnonotus sinensis	Cinnamomum camphora	3	32	8
October	Parus major	Cinnamomum camphora	4	2	1
October	Urocissa erythrorhyncha	Cinnamomum camphora	2	16	5
October	Pycnonotus xanthorrhous	Cinnamomum camphora	7	7	2
October	Parus major	Cinnamomum camphora	2	45	5
October	Hemixos castanonotus	Cinnamomum camphora	5	3	1
October	Hemixos castanonotus	Cinnamomum camphora	1	13	3
October	Pycnonotus sinensis	Cinnamomum camphora	5	2	1
October	Ixos mcclellandii	Cinnamomum camphora	7	34	2
November	Pycnonotus xanthorrhous	Cayratia japonica	3	6	2
November	Pycnonotus xanthorrhous	Cayratia japonica	1	2	1
November	Urocissa erythrorhyncha	Cayratia japonica	12	24	6
November	Pycnonotus xanthorrhous	Cayratia japonica	2	7	3
November	Pycnonotus xanthorrhous	Cayratia japonica	1	3	1
November	Hemixos castanonotus	Cayratia japonica	4	10	3
November	Streptopelia orientalis	Cayratia japonica	3	39	6
November	Pycnonotus xanthorrhous	Cayratia japonica	2	5	1
November	Urocissa erythrorhyncha	Cayratia japonica	3	6	2
November	Pycnonotus sinensis	Cayratia japonica	1	4	1
November	Pycnonotus xanthorrhous	Cayratia japonica	4	3	1
November	Hemixos castanonotus	Cayratia japonica	2	8	1
November	Pycnonotus xanthorrhous	Cayratia japonica	1	2	1
November	Streptopelia orientalis	Cayratia japonica	1	16	4
November	Pycnonotus xanthorrhous	Cayratia japonica	4	7	3
November	Pycnonotus xanthorrhous	Cayratia japonica	2	3	1
November	Hemixos castanonotus	Cayratia japonica	1	11	2
November	Turdus merula	Cayratia japonica	4	3	1
November	Pycnonotus xanthorrhous	Cayratia japonica	1	3	1
November	Pycnonotus xanthorrhous	Cayratia japonica	2	5	2
November	Pycnonotus xanthorrhous	Cayratia japonica	1	3	1
November	Pycnonotus xanthorrhous	Cayratia japonica	2	5	2
November	Pycnonotus xanthorrhous	Cayratia japonica	6	15	4
November	Parus major	Cayratia japonica	2	3	1
November	Urocissa erythrorhyncha	Cayratia japonica	3	5	3
November	Pycnonotus jocosus	Cayratia japonica	3	2	1
November	Hemixos castanonotus	Cayratia japonica	2	14	1
November	Pycnonotus sinensis	Cayratia japonica	2	3	3
November	Pycnonotus xanthorrhous	Cayratia japonica	1	2	1
November	Pycnonotus xanthorrhous	Cayratia japonica	1	3	1
November	Streptopelia orientalis	Cayratia japonica	5	8	3
November	Pycnonotus xanthorrhous	Cayratia japonica	2	3	2
November	Urocissa erythrorhyncha	Cayratia japonica	2	3	2
November	Pycnonotus sinensis	Cayratia japonica	2	10	1
November	Zosterops japonicus	Cayratia japonica	9	15	4
November	Pycnonotus xanthorrhous	Cayratia japonica	6	8	3
November	Zosterops japonicus	Cayratia japonica	3	5	1
November	Hemixos castanonotus	Cayratia japonica	2	3	2
November	Turdus merula	Cayratia japonica	3	5	3
November	Pycnonotus xanthorrhous	Cayratia japonica	6	3	1
November	Zosterops japonicus	Cayratia japonica	8	7	4
November	Pycnonotus sinensis	Cayratia japonica	4	16	2
November	Streptopelia orientalis	Cayratia japonica	2	3	2
November	Hemixos castanonotus	Cayratia japonica	2	5	3
November	Ixos mcclellandii	Cayratia japonica	3	6	1
November	Pycnonotus xanthorrhous	Cayratia japonica	3	2	1
November	Turdus merula	Cayratia japonica	5	7	2
November	Zosterops japonicus	Cayratia japonica	3	24	3
November	Turdus cardis	Cayratia japonica	2	22	3
November	Pycnonotus sinensis	Cayratia japonica	2	5	2
November	Streptopelia orientalis	Cayratia japonica	2	17	6
November	Parus venustulus	Cayratia japonica	8	5	2
November	Pycnonotus xanthorrhous	Cayratia japonica	4	3	1
November	Zosterops japonicus	Cayratia japonica	7	11	3
November	Hemixos castanonotus	Cayratia japonica	3	4	1
November	Pycnonotus xanthorrhous	Cayratia japonica	2	29	7
November	Pycnonotus xanthorrhous	Cayratia japonica	1	2	1
November	Pycnonotus xanthorrhous	Cayratia japonica	2	13	2
November	Pycnonotus xanthorrhous	Cayratia japonica	2	7	1
November	Hemixos castanonotus	Cayratia japonica	2	32	2
November	Ixos mcclellandii	Cayratia japonica	4	3	1
November	Parus major	Cayratia japonica	2	5	1
November	Pycnonotus xanthorrhous	Cayratia japonica	3	16	2
November	Pycnonotus xanthorrhous	Cayratia japonica	2	34	5
November	Pycnonotus sinensis	Cayratia japonica	5	12	2
November	Zosterops japonicus	Cayratia japonica	7	28	3
November	Hemixos castanonotus	Cayratia japonica	3	11	2
November	Pycnonotus sinensis	Cayratia japonica	3	5	2
November	Streptopelia orientalis	Cayratia japonica	2	18	4
November	Zosterops japonicus	Cayratia japonica	8	16	6
November	Zosterops japonicus	Cayratia japonica	3	14	3
November	Pycnonotus xanthorrhous	Cayratia japonica	5	12	4
November	Urocissa erythrorhyncha	Cayratia japonica	3	5	3
November	Hemixos castanonotus	Cayratia japonica	2	28	1
November	Ixos mcclellandii	Cayratia japonica	4	24	2
November	Ixos mcclellandii	Cayratia japonica	1	18	2
November	Zosterops japonicus	Cayratia japonica	3	29	5
November	Pycnonotus xanthorrhous	Cayratia japonica	5	11	1
November	Pycnonotus xanthorrhous	Cayratia japonica	2	14	3
November	Urocissa erythrorhyncha	Cayratia japonica	2	26	6
November	Hemixos castanonotus	Cayratia japonica	2	8	2
November	Zosterops japonicus	Cayratia japonica	5	11	2
November	Pycnonotus sinensis	Cayratia japonica	8	9	3
November	Zosterops japonicus	Cayratia japonica	5	21	4
November	Urocissa erythrorhyncha	Cayratia japonica	3	34	8
November	Pycnonotus xanthorrhous	Cayratia japonica	2	5	1
November	Streptopelia orientalis	Cayratia japonica	4	21	4
November	Pycnonotus sinensis	Cayratia japonica	3	22	4
November	Pycnonotus sinensis	Cayratia japonica	1	31	3
November	Streptopelia orientalis	Cayratia japonica	2	27	6
November	Pycnonotus xanthorrhous	Cayratia japonica	5	21	2
November	Turdus merula	Cayratia japonica	3	15	3
November	Ixos mcclellandii	Cayratia japonica	4	13	1
November	Urocissa erythrorhyncha	Cayratia japonica	2	9	2
November	Hemixos castanonotus	Cayratia japonica	2	3	2
November	Pycnonotus sinensis	Cayratia japonica	2	5	1
November	Streptopelia orientalis	Cayratia japonica	3	43	5
November	Pycnonotus sinensis	Cayratia japonica	3	27	2
November	Pycnonotus xanthorrhous	Cayratia japonica	2	12	2
November	Urocissa erythrorhyncha	Cayratia japonica	1	4	3
November	Turdus merula	Cayratia japonica	3	23	4
November	Zosterops japonicus	Cayratia japonica	6	62	4
November	Streptopelia orientalis	Cayratia japonica	2	13	2
November	Zosterops japonicus	Cayratia japonica	4	28	2
November	Pycnonotus xanthorrhous	Cayratia japonica	6	7	1
November	Pycnonotus sinensis	Cayratia japonica	3	16	2
November	Ixos mcclellandii	Cayratia japonica	4	44	3
November	Zosterops japonicus	Cayratia japonica	7	36	2
November	Pycnonotus xanthorrhous	Cayratia japonica	3	21	2
November	Pycnonotus sinensis	Cayratia japonica	2	29	4
November	Pycnonotus sinensis	Cayratia japonica	4	6	1
November	Streptopelia orientalis	Cayratia japonica	3	57	5
November	Pycnonotus xanthorrhous	Cayratia japonica	2	14	2
November	Urocissa erythrorhyncha	Cayratia japonica	3	42	5
November	Pycnonotus xanthorrhous	Cayratia japonica	4	22	2
November	Zosterops japonicus	Cayratia japonica	5	8	1
November	Ixos mcclellandii	Cayratia japonica	2	23	2
November	Ixos mcclellandii	Cayratia japonica	3	5	1
November	Pycnonotus xanthorrhous	Cayratia japonica	3	17	3
November	Zosterops japonicus	Cayratia japonica	2	11	2
November	Turdus merula	Cayratia japonica	4	11	2
November	Ixos mcclellandii	Cayratia japonica	2	24	3
November	Urocissa erythrorhyncha	Cayratia japonica	3	31	3
November	Ixos mcclellandii	Cayratia japonica	5	5	1
November	Pycnonotus xanthorrhous	Cayratia japonica	4	10	2
November	Pycnonotus xanthorrhous	Cayratia japonica	2	25	2
November	Zosterops japonicus	Cayratia japonica	7	63	8
November	Hemixos castanonotus	Cayratia japonica	2	14	2
November	Pycnonotus xanthorrhous	Cayratia japonica	3	27	3
November	Turdus merula	Cayratia japonica	2	29	4
November	Hemixos castanonotus	Cayratia japonica	4	6	1
November	Ixos mcclellandii	Cayratia japonica	3	8	2
November	Ixos mcclellandii	Cayratia japonica	6	34	4
November	Streptopelia orientalis	Cayratia japonica	2	25	3
November	Zosterops japonicus	Cayratia japonica	4	43	5
November	Ixos mcclellandii	Cayratia japonica	4	8	2
November	Pycnonotus xanthorrhous	Cayratia japonica	3	11	1
November	Urocissa erythrorhyncha	Cayratia japonica	3	7	2
November	Ixos mcclellandii	Cayratia japonica	6	12	2
November	Turdus merula	Cayratia japonica	2	14	2
November	Zosterops japonicus	Cayratia japonica	8	37	3
November	Ixos mcclellandii	Cayratia japonica	3	8	2
November	Hemixos castanonotus	Cayratia japonica	2	15	2
November	Hemixos castanonotus	Cayratia japonica	1	7	1
November	Urocissa erythrorhyncha	Cayratia japonica	2	32	8
November	Pycnonotus xanthorrhous	Cayratia japonica	5	41	4
November	Zosterops japonicus	Cayratia japonica	8	14	4
November	Zosterops japonicus	Cayratia japonica	3	24	2
November	Pycnonotus xanthorrhous	Cayratia japonica	5	61	4
November	Pycnonotus xanthorrhous	Cayratia japonica	3	11	2
November	Streptopelia orientalis	Cayratia japonica	2	32	5
November	Pycnonotus sinensis	Cayratia japonica	4	22	2
November	Pycnonotus xanthorrhous	Cayratia japonica	6	29	5
November	Ixos mcclellandii	Cayratia japonica	5	6	9
November	Pycnonotus sinensis	Cayratia japonica	2	8	2
November	Turdus merula	Cayratia japonica	7	6	2
November	Pycnonotus xanthorrhous	Cayratia japonica	3	20	1
November	Zosterops japonicus	Cayratia japonica	5	36	2
November	Hemixos castanonotus	Cayratia japonica	2	19	2
November	Pycnonotus xanthorrhous	Cayratia japonica	4	2	1
November	Pycnonotus sinensis	Cayratia japonica	6	27	3
November	Parus major	Cayratia japonica	1	12	2
November	Hemixos castanonotus	Cayratia japonica	3	6	2
November	Pycnonotus xanthorrhous	Cayratia japonica	2	2	1
November	Zosterops japonicus	Cayratia japonica	6	43	11
November	Turdus merula	Cayratia japonica	3	16	3
November	Turdus cardis	Cayratia japonica	1	38	5
November	Urocissa erythrorhyncha	Cayratia japonica	1	11	4
November	Pycnonotus sinensis	Cayratia japonica	2	3	2
November	Zosterops japonicus	Cayratia japonica	2	13	3
November	Pycnonotus xanthorrhous	Cayratia japonica	1	17	5
November	Turdus merula	Cayratia japonica	4	25	2
November	Streptopelia orientalis	Cayratia japonica	3	42	8
November	Copsychus saularis	Cinnamomum camphora	1	16	5
November	Pycnonotus xanthorrhous	Cinnamomum camphora	1	43	3
November	Pycnonotus xanthorrhous	Cinnamomum camphora	3	13	3
November	Pycnonotus xanthorrhous	Cinnamomum camphora	1	3	1
November	Pycnonotus xanthorrhous	Cayratia japonica	3	26	3
November	Pycnonotus xanthorrhous	Cayratia japonica	1	2	1
November	Parus major	Cinnamomum camphora	4	5	2
November	Zosterops japonicus	Magnolia grandiflora	5	12	4
November	Urocissa erythrorhyncha	Magnolia grandiflora	1	12	1
November	Streptopelia orientalis	Rauvolfia verticillata	1	18	2
November	Urocissa erythrorhyncha	Rauvolfia verticillata	1	10	2
November	Parus venustulus	Cinnamomum camphora	3	5	2
November	Urocissa erythrorhyncha	Cinnamomum camphora	1	10	4
November	Zosterops japonicus	Magnolia grandiflora	2	18	3
November	Urocissa erythrorhyncha	Magnolia grandiflora	1	21	1
November	Urocissa erythrorhyncha	Magnolia grandiflora	1	18	2
November	Urocissa erythrorhyncha	Rauvolfia verticillata	1	23	3
November	Pycnonotus xanthorrhous	Cinnamomum camphora	2	3	1
November	Copsychus saularis	Cinnamomum camphora	1	2	1
November	Urocissa erythrorhyncha	Cinnamomum camphora	1	8	3
November	Ixos mcclellandii	Cinnamomum camphora	1	41	8
November	Pycnonotus xanthorrhous	Cinnamomum camphora	1	23	3
November	Pycnonotus xanthorrhous	Cinnamomum camphora	7	3	1
November	Copsychus saularis	Cinnamomum camphora	1	32	4
November	Pycnonotus xanthorrhous	Cinnamomum camphora	1	2	1
November	Urocissa erythrorhyncha	Cinnamomum camphora	1	6	3
November	Pycnonotus sinensis	Cinnamomum camphora	2	32	6
November	Pycnonotus xanthorrhous	Cinnamomum camphora	8	5	2
November	Pycnonotus xanthorrhous	Cinnamomum camphora	1	19	1
November	Urocissa erythrorhyncha	Cayratia japonica	12	24	6
November	Pycnonotus xanthorrhous	Cayratia japonica	2	7	3
November	Pycnonotus sinensis	Cinnamomum camphora	1	8	2
November	Pycnonotus sinensis	Cinnamomum camphora	1	3	1
November	Pycnonotus xanthorrhous	Cayratia japonica	1	23	2
November	Hemixos castanonotus	Cayratia japonica	4	10	3
November	Hemixos castanonotus	Magnolia grandiflora	2	5	2
November	Urocissa erythrorhyncha	Rauvolfia verticillata	1	13	2
November	Streptopelia orientalis	Cayratia japonica	3	39	5
November	Zosterops japonicus	Cinnamomum camphora	2	10	2
November	Hemixos castanonotus	Cinnamomum camphora	1	23	2
November	Hemixos castanonotus	Rauvolfia verticillata	2	7	2
November	Turdus cardis	Rauvolfia verticillata	1	13	1
November	Streptopelia orientalis	Rauvolfia verticillata	1	9	1
November	Streptopelia orientalis	Rauvolfia verticillata	2	17	3
November	Pycnonotus xanthorrhous	Cayratia japonica	2	5	1
November	Parus major	Cinnamomum camphora	3	4	1
November	Pycnonotus sinensis	Cinnamomum camphora	2	15	2
November	Streptopelia orientalis	Tetrastigma planicaule	3	39	5
November	Pycnonotus jocosus	Tetrastigma planicaule	1	11	1
November	Ixos mcclellandii	Cinnamomum camphora	1	3	1
November	Pycnonotus xanthorrhous	Cinnamomum camphora	3	15	1
November	Pycnonotus sinensis	Cinnamomum camphora	1	6	1
November	Urocissa erythrorhyncha	Cayratia japonica	3	12	2
November	Pycnonotus sinensis	Cayratia japonica	1	21	1
November	Pycnonotus xanthorrhous	Cayratia japonica	4	53	5
November	Hemixos castanonotus	Cayratia japonica	2	11	1
November	Zosterops japonicus	Cayratia japonica	1	17	2
November	Parus major	Cinnamomum camphora	3	9	1
November	Parus venustulus	Cinnamomum camphora	1	13	2
November	Copsychus saularis	Cinnamomum camphora	1	10	1
November	Pycnonotus xanthorrhous	Magnolia grandiflora	1	23	5
November	Ixos mcclellandii	Cinnamomum camphora	2	8	1
November	Parus venustulus	Cinnamomum camphora	2	3	1
November	Streptopelia orientalis	Cayratia japonica	1	16	3
November	Pycnonotus xanthorrhous	Cinnamomum camphora	7	47	3
November	Parus venustulus	Cinnamomum camphora	3	9	3
November	Hemixos castanonotus	Cinnamomum camphora	4	36	1
November	Parus major	Cinnamomum camphora	2	27	3
November	Pycnonotus xanthorrhous	Cayratia japonica	4	9	3
November	Urocissa erythrorhyncha	Ilex cornuta	1	11	2
November	Pycnonotus xanthorrhous	Cayratia japonica	2	4	1
November	Turdus merula	Cinnamomum camphora	1	6	2
November	Parus major	Cinnamomum camphora	1	23	2
November	Hemixos castanonotus	Magnolia grandiflora	5	8	2
November	Hemixos castanonotus	Cayratia japonica	1	34	2
November	Zosterops japonicus	Magnolia grandiflora	3	18	2
November	Parus venustulus	Cayratia japonica	4	13	1
November	Pycnonotus sinensis	Magnolia grandiflora	3	15	3
November	Pycnonotus xanthorrhous	Magnolia grandiflora	1	21	1
November	Parus venustulus	Cinnamomum camphora	1	33	4
November	Zosterops japonicus	Magnolia grandiflora	2	17	3
November	Parus major	Cinnamomum camphora	5	6	1
November	Copsychus saularis	Cinnamomum camphora	1	24	2
November	Hemixos castanonotus	Cinnamomum camphora	2	22	1
November	Pycnonotus sinensis	Cinnamomum camphora	2	13	2
November	Pycnonotus xanthorrhous	Cinnamomum camphora	6	35	3
November	Ixos mcclellandii	Cinnamomum camphora	1	8	1
November	Parus major	Cinnamomum camphora	3	11	2
November	Pycnonotus xanthorrhous	Cinnamomum camphora	12	8	4
November	Copsychus saularis	Cinnamomum camphora	2	10	1
November	Pycnonotus sinensis	Cinnamomum camphora	6	55	6
November	Hemixos castanonotus	Cinnamomum camphora	3	9	1
November	Pycnonotus xanthorrhous	Cinnamomum camphora	2	20	2
November	Pycnonotus xanthorrhous	Cinnamomum camphora	1	24	5
November	Parus venustulus	Cinnamomum camphora	1	21	1
November	Urocissa erythrorhyncha	Cayratia japonica	1	3	1
November	Parus major	Cinnamomum camphora	2	14	2
November	Ixos mcclellandii	Cinnamomum camphora	3	27	1
November	Copsychus saularis	Cinnamomum camphora	2	32	2
November	Parus venustulus	Cinnamomum camphora	1	7	2
November	Parus major	Cinnamomum camphora	2	22	4
November	Pycnonotus xanthorrhous	Cinnamomum camphora	8	5	1
November	Pycnonotus xanthorrhous	Magnolia grandiflora	2	13	1
November	Pycnonotus xanthorrhous	Cinnamomum camphora	1	28	6
November	Ixos mcclellandii	Cinnamomum camphora	7	8	3
November	Hemixos castanonotus	Cinnamomum camphora	5	4	2
November	Pycnonotus xanthorrhous	Cinnamomum camphora	11	7	3
November	Pycnonotus sinensis	Cinnamomum camphora	6	3	1
November	Ixos mcclellandii	Cinnamomum camphora	2	5	2
November	Zosterops japonicus	Magnolia grandiflora	2	17	2
November	Copsychus saularis	Cinnamomum camphora	3	24	1
November	Pycnonotus xanthorrhous	Cayratia japonica	2	21	2
November	Pycnonotus xanthorrhous	Cinnamomum camphora	12	28	4
November	Copsychus saularis	Cinnamomum camphora	2	9	1
November	Pycnonotus sinensis	Cinnamomum camphora	6	25	3
November	Hemixos castanonotus	Cinnamomum camphora	3	22	2
November	Pycnonotus xanthorrhous	Cinnamomum camphora	2	13	1
November	Pycnonotus xanthorrhous	Cinnamomum camphora	1	24	5
November	Parus venustulus	Cinnamomum camphora	1	27	4
November	Pycnonotus sinensis	Cayratia japonica	1	16	1
November	Parus major	Cinnamomum camphora	2	23	2
November	Ixos mcclellandii	Cinnamomum camphora	3	6	1
November	Copsychus saularis	Cinnamomum camphora	2	4	2
November	Parus venustulus	Cinnamomum camphora	1	27	2
November	Parus major	Cinnamomum camphora	2	22	4
November	Pycnonotus xanthorrhous	Cinnamomum camphora	8	5	1
November	Pycnonotus xanthorrhous	Magnolia grandiflora	2	33	4
November	Pycnonotus xanthorrhous	Cinnamomum camphora	1	28	6
November	Ixos mcclellandii	Cinnamomum camphora	7	29	3
November	Hemixos castanonotus	Cinnamomum camphora	5	14	2
November	Copsychus saularis	Ilex cornuta	1	8	1
November	Pycnonotus xanthorrhous	Cinnamomum camphora	11	27	3
November	Pycnonotus sinensis	Cinnamomum camphora	6	64	7
November	Ixos mcclellandii	Cinnamomum camphora	2	35	2
November	Zosterops japonicus	Magnolia grandiflora	2	45	5
November	Copsychus saularis	Cinnamomum camphora	3	11	1
November	Pycnonotus xanthorrhous	Cayratia japonica	2	19	2
November	Pycnonotus xanthorrhous	Cinnamomum camphora	5	32	3
November	Pycnonotus xanthorrhous	Cinnamomum camphora	3	13	5
November	Parus major	Cinnamomum camphora	2	22	1
November	Pycnonotus sinensis	Cinnamomum camphora	3	13	2
November	Parus venustulus	Cinnamomum camphora	2	32	4
November	Parus major	Cinnamomum camphora	1	20	1
November	Turdus merula	Cinnamomum camphora	4	26	2
November	Ixos mcclellandii	Cinnamomum camphora	5	15	2
November	Pycnonotus xanthorrhous	Cinnamomum camphora	8	18	2
November	Ixos mcclellandii	Cinnamomum camphora	2	7	1
November	Pycnonotus xanthorrhous	Cayratia japonica	6	15	4
November	Parus major	Cayratia japonica	2	23	1
November	Zosterops japonicus	Magnolia grandiflora	3	31	2
November	Urocissa erythrorhyncha	Cayratia japonica	3	10	3
November	Pycnonotus xanthorrhous	Ilex cornuta	4	14	2
November	Pycnonotus sinensis	Ilex cornuta	5	11	4
November	Copsychus saularis	Ilex cornuta	1	11	1
November	Ixos mcclellandii	Cinnamomum camphora	1	13	2
November	Hemixos castanonotus	Cinnamomum camphora	7	25	2
November	Pycnonotus jocosus	Cayratia japonica	3	12	1
November	Hemixos castanonotus	Cayratia japonica	2	34	4
November	Pycnonotus sinensis	Cayratia japonica	2	6	3
November	Ixos mcclellandii	Cayratia japonica	1	22	1
November	Ixos mcclellandii	Cayratia japonica	1	12	2
November	Parus venustulus	Cinnamomum camphora	3	7	2
November	Pycnonotus jocosus	Cinnamomum camphora	2	31	4
November	Hemixos castanonotus	Cinnamomum camphora	3	5	2
November	Urocissa erythrorhyncha	Ilex cornuta	1	8	2
November	Parus major	Cinnamomum camphora	2	12	2
November	Ixos mcclellandii	Cinnamomum camphora	5	17	3
November	Pycnonotus sinensis	Cinnamomum camphora	1	16	1
November	Pycnonotus xanthorrhous	Cinnamomum camphora	3	14	2
November	Pycnonotus xanthorrhous	Cinnamomum camphora	2	13	1
November	Urocissa erythrorhyncha	Ilex cornuta	2	29	5
November	Pycnonotus xanthorrhous	Cinnamomum camphora	13	36	6
November	Pycnonotus sinensis	Cinnamomum camphora	4	25	2
November	Hemixos castanonotus	Cinnamomum camphora	5	38	5
November	Hemixos castanonotus	Ilex cornuta	3	20	3
November	Turdus merula	Cinnamomum camphora	7	29	4
November	Ixos mcclellandii	Cinnamomum camphora	3	14	2
November	Turdus merula	Magnolia grandiflora	3	11	1
November	Pycnonotus xanthorrhous	Magnolia grandiflora	7	29	4
November	Pycnonotus sinensis	Magnolia grandiflora	2	4	1
November	Hemixos castanonotus	Magnolia grandiflora	2	13	1
November	Zosterops japonicus	Magnolia grandiflora	4	35	3
November	Pycnonotus sinensis	Cinnamomum camphora	2	8	1
November	Pycnonotus xanthorrhous	Cinnamomum camphora	3	12	1
November	Pycnonotus jocosus	Cinnamomum camphora	5	43	2
November	Urocissa erythrorhyncha	Cinnamomum camphora	7	13	2
November	Streptopelia orientalis	Cayratia japonica	5	28	4
November	Pycnonotus xanthorrhous	Cayratia japonica	2	23	2
November	Urocissa erythrorhyncha	Cayratia japonica	2	16	2
November	Pycnonotus sinensis	Cayratia japonica	2	32	4
November	Pycnonotus xanthorrhous	Cinnamomum camphora	5	43	2
November	Parus major	Cinnamomum camphora	2	5	1
November	Pycnonotus xanthorrhous	Cinnamomum camphora	7	34	7
November	Pycnonotus sinensis	Cinnamomum camphora	5	7	2
November	Ixos mcclellandii	Cinnamomum camphora	12	10	3
November	Hemixos castanonotus	Cinnamomum camphora	6	13	2
November	Streptopelia orientalis	Cinnamomum camphora	3	32	2
November	Streptopelia orientalis	Cinnamomum camphora	4	24	2
November	Streptopelia orientalis	Cinnamomum camphora	4	16	1
November	Copsychus saularis	Cinnamomum camphora	2	27	1
November	Parus major	Cinnamomum camphora	3	32	2
November	Turdus merula	Cinnamomum camphora	4	24	2
November	Pycnonotus xanthorrhous	Cinnamomum camphora	2	16	1
November	Zosterops japonicus	Cayratia japonica	9	18	4
November	Pycnonotus xanthorrhous	Cayratia japonica	6	7	3
November	Zosterops japonicus	Cayratia japonica	3	13	1
November	Hemixos castanonotus	Cayratia japonica	2	24	2
November	Pycnonotus xanthorrhous	Magnolia grandiflora	3	21	2
November	Zosterops japonicus	Magnolia grandiflora	7	32	3
November	Ixos mcclellandii	Magnolia grandiflora	5	15	2
November	Ixos mcclellandii	Tetrastigma planicaule	8	22	4
November	Pycnonotus jocosus	Tetrastigma planicaule	1	9	1
November	Urocissa erythrorhyncha	Tetrastigma planicaule	1	13	1
November	Ixos mcclellandii	Cinnamomum camphora	1	20	4
November	Ixos mcclellandii	Cinnamomum camphora	1	26	9
November	Ixos mcclellandii	Cinnamomum camphora	11	27	3
November	Pycnonotus xanthorrhous	Cinnamomum camphora	12	29	3
November	Hemixos castanonotus	Cinnamomum camphora	6	31	2
November	Pycnonotus sinensis	Cinnamomum camphora	2	5	1
November	Urocissa erythrorhyncha	Tetrastigma planicaule	2	13	4
November	Turdus merula	Cinnamomum camphora	3	13	11
November	Streptopelia orientalis	Cinnamomum camphora	4	16	5
November	Streptopelia orientalis	Cinnamomum camphora	5	28	6
November	Streptopelia orientalis	Cinnamomum camphora	4	14	1
November	Streptopelia orientalis	Cinnamomum camphora	7	11	2
November	Turdus merula	Cinnamomum camphora	2	16	5
November	Pycnonotus xanthorrhous	Cinnamomum camphora	5	38	6
November	Pycnonotus xanthorrhous	Cinnamomum camphora	3	14	1
November	Ixos mcclellandii	Cinnamomum camphora	7	11	2
November	Urocissa erythrorhyncha	Tetrastigma planicaule	1	8	1
November	Pycnonotus xanthorrhous	Cinnamomum camphora	3	17	4
November	Pycnonotus sinensis	Cinnamomum camphora	2	13	2
November	Hemixos castanonotus	Cinnamomum camphora	6	21	3
November	Zosterops japonicus	Magnolia grandiflora	3	18	2
November	Pycnonotus xanthorrhous	Magnolia grandiflora	2	16	2
November	Pycnonotus sinensis	Magnolia grandiflora	3	12	1
November	Hemixos castanonotus	Magnolia grandiflora	1	7	3
November	Ixos mcclellandii	Magnolia grandiflora	2	11	1
November	Urocissa erythrorhyncha	Cinnamomum camphora	3	17	8
November	Ixos mcclellandii	Cinnamomum camphora	4	5	3
November	Ixos mcclellandii	Cinnamomum camphora	2	23	4
November	Turdus merula	Cayratia japonica	3	5	3
November	Pycnonotus xanthorrhous	Cayratia japonica	6	15	1
November	Zosterops japonicus	Cayratia japonica	8	17	4
November	Pycnonotus sinensis	Cayratia japonica	4	13	2
November	Streptopelia orientalis	Cayratia japonica	2	5	2
November	Parus venustulus	Cinnamomum camphora	7	22	1
November	Zosterops japonicus	Cinnamomum camphora	5	3	1
November	Streptopelia orientalis	Cinnamomum camphora	3	26	4
November	Ixos mcclellandii	Cinnamomum camphora	3	14	3
November	Hemixos castanonotus	Cinnamomum camphora	2	18	2
November	Ixos mcclellandii	Cinnamomum camphora	1	2	1
November	Hemixos castanonotus	Cinnamomum camphora	4	42	4
November	Turdus cardis	Cinnamomum camphora	3	13	3
November	Hemixos castanonotus	Cayratia japonica	2	5	3
November	Ixos mcclellandii	Cayratia japonica	3	23	2
November	Pycnonotus xanthorrhous	Cayratia japonica	3	21	1
November	Turdus merula	Cayratia japonica	5	3	2
November	Zosterops japonicus	Cayratia japonica	3	16	3
November	Ixos mcclellandii	Cinnamomum camphora	4	33	2
November	Pycnonotus xanthorrhous	Cinnamomum camphora	2	12	1
November	Hemixos castanonotus	Cinnamomum camphora	4	24	2
November	Turdus cardis	Cayratia japonica	2	22	3
November	Hemixos castanonotus	Magnolia grandiflora	1	27	3
November	Pycnonotus sinensis	Cayratia japonica	2	21	2
November	Pycnonotus sinensis	Magnolia grandiflora	2	20	1
November	Parus major	Magnolia grandiflora	4	12	3
November	Parus major	Magnolia grandiflora	1	8	1
November	Ixos mcclellandii	Cinnamomum camphora	2	8	1
November	Parus major	Cinnamomum camphora	3	35	4
November	Streptopelia orientalis	Cayratia japonica	2	17	6
November	Parus venustulus	Cayratia japonica	8	13	2
November	Pycnonotus xanthorrhous	Cayratia japonica	4	26	3
November	Zosterops japonicus	Cayratia japonica	7	12	3
November	Hemixos castanonotus	Cayratia japonica	3	2	1
November	Pycnonotus xanthorrhous	Cayratia japonica	2	29	7
November	Pycnonotus xanthorrhous	Cayratia japonica	1	12	2
November	Pycnonotus xanthorrhous	Cayratia japonica	2	13	2
November	Parus venustulus	Cinnamomum camphora	5	26	1
November	Turdus cardis	Cinnamomum camphora	1	11	5
November	Pycnonotus xanthorrhous	Ilex cornuta	1	23	2
November	Ixos mcclellandii	Ilex cornuta	2	18	4
November	Pycnonotus xanthorrhous	Cayratia japonica	2	7	1
November	Hemixos castanonotus	Cayratia japonica	2	24	3
November	Ixos mcclellandii	Cayratia japonica	4	2	1
November	Ixos mcclellandii	Cinnamomum camphora	2	31	2
November	Ixos mcclellandii	Cinnamomum camphora	3	14	1
November	Pycnonotus xanthorrhous	Magnolia grandiflora	3	6	2
November	Zosterops japonicus	Magnolia grandiflora	2	37	4
November	Parus venustulus	Cinnamomum camphora	2	5	2
November	Hemixos castanonotus	Cinnamomum camphora	3	19	4
November	Parus major	Cayratia japonica	2	22	2
November	Pycnonotus xanthorrhous	Cinnamomum camphora	5	52	3
November	Ixos mcclellandii	Cinnamomum camphora	4	14	5
December	Zosterops japonicus	Cayratia japonica	7	13	3
December	Turdus hortulorum	Cayratia japonica	1	18	2
December	Pycnonotus xanthorrhous	Cayratia japonica	3	28	3
December	Pycnonotus xanthorrhous	Cayratia japonica	2	29	3
December	Zosterops japonicus	Cayratia japonica	1	17	1
December	Pycnonotus xanthorrhous	Cayratia japonica	3	41	5
December	Zosterops japonicus	Cayratia japonica	5	11	2
December	Pycnonotus sinensis	Cayratia japonica	2	5	3
December	Urocissa erythrorhyncha	Cayratia japonica	4	33	7
December	Turdus cardis	Cayratia japonica	1	47	3
December	Pycnonotus xanthorrhous	Cayratia japonica	2	8	2
December	Zosterops japonicus	Cayratia japonica	8	12	3
December	Pycnonotus xanthorrhous	Cayratia japonica	2	5	1
December	Pycnonotus sinensis	Cayratia japonica	3	61	6
December	Ixos mcclellandii	Cayratia japonica	3	8	2
December	Hemixos castanonotus	Cayratia japonica	2	24	2
December	Pycnonotus xanthorrhous	Cayratia japonica	2	8	2
December	Zosterops japonicus	Cayratia japonica	8	36	3
December	Zosterops japonicus	Cayratia japonica	6	19	1
December	Zosterops japonicus	Cayratia japonica	2	11	1
December	Pycnonotus xanthorrhous	Cayratia japonica	3	57	3
December	Pycnonotus xanthorrhous	Cayratia japonica	2	45	2
December	Zosterops japonicus	Cayratia japonica	1	6	1
December	Hemixos castanonotus	Cayratia japonica	1	10	1
December	Turdus merula	Cayratia japonica	3	8	1
December	Ixos mcclellandii	Cayratia japonica	2	34	4
December	Hemixos castanonotus	Cayratia japonica	3	5	1
December	Pycnonotus xanthorrhous	Cayratia japonica	2	15	2
December	Pycnonotus xanthorrhous	Cayratia japonica	2	19	2
December	Zosterops japonicus	Cayratia japonica	6	7	1
December	Pycnonotus xanthorrhous	Cayratia japonica	3	16	2
December	Pycnonotus xanthorrhous	Cayratia japonica	2	34	5
December	Zosterops japonicus	Cayratia japonica	7	12	3
December	Turdus hortulorum	Cayratia japonica	1	14	2
December	Pycnonotus xanthorrhous	Cayratia japonica	3	28	3
December	Pycnonotus xanthorrhous	Cayratia japonica	2	29	6
December	Zosterops japonicus	Cayratia japonica	1	14	1
December	Pycnonotus xanthorrhous	Cayratia japonica	3	41	5
December	Zosterops japonicus	Cayratia japonica	5	21	2
December	Pycnonotus sinensis	Cayratia japonica	2	53	3
December	Pycnonotus xanthorrhous	Cayratia japonica	3	41	5
December	Zosterops japonicus	Cayratia japonica	5	14	2
December	Pycnonotus sinensis	Cayratia japonica	2	43	3
December	Zosterops japonicus	Cayratia japonica	8	31	3
December	Pycnonotus sinensis	Cayratia japonica	3	64	6
December	Ixos mcclellandii	Cayratia japonica	3	5	2
December	Hemixos castanonotus	Cayratia japonica	2	26	1
December	Zosterops japonicus	Cayratia japonica	8	33	3
December	Pycnonotus sinensis	Cayratia japonica	1	7	1
December	Hemixos castanonotus	Cayratia japonica	3	37	5
December	Pycnonotus xanthorrhous	Cayratia japonica	6	17	3
December	Turdus merula	Cayratia japonica	2	11	2
December	Pycnonotus xanthorrhous	Cayratia japonica	2	20	5
December	Zosterops japonicus	Cayratia japonica	5	5	1
December	Pycnonotus xanthorrhous	Cayratia japonica	1	7	2
December	Zosterops japonicus	Cayratia japonica	2	13	2
December	Pycnonotus xanthorrhous	Cayratia japonica	9	71	7
December	Pycnonotus xanthorrhous	Cayratia japonica	2	47	6
December	Ixos mcclellandii	Cayratia japonica	1	13	5
December	Turdus merula	Cayratia japonica	5	84	7
December	Pycnonotus sinensis	Cayratia japonica	7	33	4
December	Streptopelia orientalis	Cayratia japonica	2	45	6
December	Zosterops japonicus	Cayratia japonica	3	46	6
December	Ixos mcclellandii	Cayratia japonica	4	23	5
December	Turdus merula	Cayratia japonica	5	22	1
December	Turdus hortulorum	Cayratia japonica	2	16	2
December	Hemixos castanonotus	Cayratia japonica	3	58	12
December	Pycnonotus xanthorrhous	Cayratia japonica	2	43	9
December	Ixos mcclellandii	Cayratia japonica	5	6	2
December	Pycnonotus sinensis	Cayratia japonica	7	52	8
December	Urocissa erythrorhyncha	Cayratia japonica	3	7	2
December	Pycnonotus sinensis	Cayratia japonica	2	14	4
December	Pycnonotus xanthorrhous	Cayratia japonica	1	73	8
December	Zosterops japonicus	Cayratia japonica	6	6	2
December	Pycnonotus jocosus	Cayratia japonica	4	52	8
December	Pycnonotus xanthorrhous	Cayratia japonica	1	7	2
December	Zosterops japonicus	Cayratia japonica	1	8	1
December	Turdus merula	Cayratia japonica	3	24	4
December	Zosterops japonicus	Cayratia japonica	8	61	7
December	Pycnonotus sinensis	Cayratia japonica	7	41	8
December	Zosterops japonicus	Cayratia japonica	3	52	5
December	Streptopelia orientalis	Cayratia japonica	5	3	1
December	Pycnonotus xanthorrhous	Cayratia japonica	2	29	5
December	Pycnonotus sinensis	Cayratia japonica	4	46	9
December	Pycnonotus xanthorrhous	Cayratia japonica	1	8	2
December	Zosterops japonicus	Cayratia japonica	2	4	2
December	Pycnonotus xanthorrhous	Cayratia japonica	3	42	8
December	Turdus merula	Cayratia japonica	1	16	3
December	Pycnonotus xanthorrhous	Cayratia japonica	1	8	2
December	Pycnonotus sinensis	Cayratia japonica	2	28	4
December	Pycnonotus xanthorrhous	Cayratia japonica	7	9	2
December	Zosterops japonicus	Cayratia japonica	5	5	1
December	Zosterops japonicus	Cayratia japonica	1	28	7
December	Pycnonotus xanthorrhous	Cayratia japonica	6	12	2
December	Turdus merula	Cayratia japonica	2	14	2
December	Hemixos castanonotus	Cayratia japonica	1	31	5
December	Pycnonotus sinensis	Cayratia japonica	3	67	11
December	Ixos mcclellandii	Cayratia japonica	3	14	5
December	Zosterops japonicus	Cayratia japonica	4	52	6
December	Pycnonotus sinensis	Cayratia japonica	9	2	1
December	Ixos mcclellandii	Cayratia japonica	3	29	4
December	Pycnonotus sinensis	Cayratia japonica	2	46	6
December	Pycnonotus xanthorrhous	Cayratia japonica	1	8	1
December	Pycnonotus xanthorrhous	Cayratia japonica	1	14	2
December	Pycnonotus xanthorrhous	Cayratia japonica	4	20	1
December	Pycnonotus xanthorrhous	Cayratia japonica	4	36	2
December	Turdus merula	Cayratia japonica	2	74	4
December	Hemixos castanonotus	Cayratia japonica	7	14	2
December	Zosterops japonicus	Cayratia japonica	2	8	3
December	Pycnonotus xanthorrhous	Cayratia japonica	6	11	2
December	Streptopelia orientalis	Cayratia japonica	3	18	2
December	Hemixos castanonotus	Cayratia japonica	2	7	1
December	Pycnonotus xanthorrhous	Cayratia japonica	5	51	10
December	Pycnonotus xanthorrhous	Cayratia japonica	3	20	2
December	Streptopelia orientalis	Cayratia japonica	3	4	1
December	Zosterops japonicus	Cayratia japonica	1	5	2
December	Urocissa erythrorhyncha	Cayratia japonica	2	24	3
December	Turdus cardis	Cayratia japonica	3	32	4
December	Turdus hortulorum	Cayratia japonica	2	6s	1
December	Pycnonotus sinensis	Cayratia japonica	3	23	3
December	Pycnonotus sinensis	Cayratia japonica	7	28	4
December	Hemixos castanonotus	Cayratia japonica	3	11	1
December	Ixos mcclellandii	Cayratia japonica	2	42	4
December	Turdus merula	Cayratia japonica	4	5	1
December	Turdus merula	Cayratia japonica	5	12	2
December	Parus major	Cayratia japonica	4	31	2
December	Zosterops japonicus	Cayratia japonica	6	24	1
December	Zosterops japonicus	Cayratia japonica	3	3	1
December	Urocissa erythrorhyncha	Cayratia japonica	1	25	4
December	Pycnonotus xanthorrhous	Cayratia japonica	3	21	2
December	Turdus merula	Cayratia japonica	1	15	1
December	Pycnonotus sinensis	Cayratia japonica	2	8	2
December	Zosterops japonicus	Cayratia japonica	6	54	10
December	Pycnonotus xanthorrhous	Cayratia japonica	3	29	5
December	Hemixos castanonotus	Cayratia japonica	2	32	7
December	Parus major	Cayratia japonica	2	7	1
December	Zosterops japonicus	Cayratia japonica	2	25	2
December	Turdus merula	Cayratia japonica	5	12	2
December	Pycnonotus xanthorrhous	Cayratia japonica	2	14	1
December	Pycnonotus xanthorrhous	Cayratia japonica	4	31	5
December	Ixos mcclellandii	Cayratia japonica	2	76	11
December	Zosterops japonicus	Cayratia japonica	5	16	5
December	Pycnonotus sinensis	Cayratia japonica	6	27	8
December	Zosterops japonicus	Cayratia japonica	5	10	2
December	Pycnonotus xanthorrhous	Cayratia japonica	1	49	7
December	Hemixos castanonotus	Cayratia japonica	9	6	1
December	Pycnonotus sinensis	Cayratia japonica	4	5	2
December	Urocissa erythrorhyncha	Cayratia japonica	2	29	5
December	Streptopelia orientalis	Cayratia japonica	2	7	1
December	Pycnonotus xanthorrhous	Magnolia grandiflora	3	38	4
December	Pycnonotus xanthorrhous	Magnolia grandiflora	1	45	1
December	Pycnonotus xanthorrhous	Magnolia grandiflora	2	17	2
December	Hemixos castanonotus	Magnolia grandiflora	2	47	1
December	Pycnonotus xanthorrhous	Magnolia grandiflora	3	32	3
December	Turdus merula	Magnolia grandiflora	2	7	2
December	Pycnonotus xanthorrhous	Cayratia japonica	3	16	2
December	Pycnonotus xanthorrhous	Cayratia japonica	2	34	5
December	Zosterops japonicus	Cayratia japonica	7	13	3
December	Turdus hortulorum	Cayratia japonica	1	18	2
December	Pycnonotus xanthorrhous	Cayratia japonica	3	28	3
December	Pycnonotus xanthorrhous	Cayratia japonica	2	28	6
December	Zosterops japonicus	Cayratia japonica	1	11	1
December	Parus venustulus	Cinnamomum camphora	13	12	1
December	Zosterops japonicus	Cinnamomum camphora	5	17	1
December	Pycnonotus xanthorrhous	Cayratia japonica	3	41	5
December	Zosterops japonicus	Cayratia japonica	5	13	2
December	Pycnonotus sinensis	Cayratia japonica	2	53	3
December	Pycnonotus sinensis	Magnolia grandiflora	1	12	1
December	Pycnonotus xanthorrhous	Magnolia grandiflora	12	58	3
December	Ixos mcclellandii	Cinnamomum camphora	5	5	1
December	Turdus hortulorum	Cinnamomum camphora	1	14	1
December	Pycnonotus xanthorrhous	Ilex cornuta	2	5	1
December	Turdus merula	Cinnamomum camphora	1	43	5
December	Pycnonotus xanthorrhous	Cinnamomum camphora	5	18	4
December	Hemixos castanonotus	Cinnamomum camphora	7	8	2
December	Ixos mcclellandii	Cinnamomum camphora	3	3	1
December	Pycnonotus sinensis	Cinnamomum camphora	2	13	2
December	Zosterops japonicus	Cinnamomum camphora	6	7	1
December	Urocissa erythrorhyncha	Cayratia japonica	4	32	6
December	Turdus cardis	Cayratia japonica	1	47	3
December	Hemixos castanonotus	Magnolia grandiflora	1	19	1
December	Pycnonotus xanthorrhous	Magnolia grandiflora	3	7	1
December	Urocissa erythrorhyncha	Cayratia japonica	2	65	8
December	Pycnonotus xanthorrhous	Cayratia japonica	2	8	2
December	Zosterops japonicus	Cayratia japonica	8	31	3
December	Pycnonotus xanthorrhous	Cayratia japonica	2	5	1
December	Pycnonotus sinensis	Cayratia japonica	3	31	6
December	Ixos mcclellandii	Cayratia japonica	3	8	2
December	Hemixos castanonotus	Cayratia japonica	2	26	1
December	Pycnonotus xanthorrhous	Cayratia japonica	2	8	2
December	Zosterops japonicus	Cayratia japonica	8	36	3
December	Pycnonotus xanthorrhous	Ilex cornuta	1	6	1
December	Pycnonotus sinensis	Ilex cornuta	1	11	2
December	Hemixos castanonotus	Magnolia grandiflora	2	4	1
December	Turdus merula	Magnolia grandiflora	1	16	1
December	Urocissa erythrorhyncha	Cinnamomum camphora	3	21	4
December	Turdus merula	Cinnamomum camphora	3	17	2
December	Turdus cardis	Cinnamomum camphora	1	9	2
December	Pycnonotus xanthorrhous	Cinnamomum camphora	5	13	2
December	Hemixos castanonotus	Cinnamomum camphora	3	6	1
December	Ixos mcclellandii	Cinnamomum camphora	4	8	2
December	Zosterops japonicus	Cinnamomum camphora	3	23	3
December	Zosterops japonicus	Magnolia grandiflora	3	9	1
December	Pycnonotus sinensis	Cinnamomum camphora	2	5	1
December	Ixos mcclellandii	Cinnamomum camphora	6	14	3
December	Pycnonotus xanthorrhous	Cinnamomum camphora	7	34	3
December	Parus major	Cinnamomum camphora	2	4	1
December	Turdus cardis	Cinnamomum camphora	3	12	3
December	Hemixos castanonotus	Cinnamomum camphora	2	7	1
December	Ixos mcclellandii	Cinnamomum camphora	2	14	4
December	Pycnonotus xanthorrhous	Cinnamomum camphora	2	76	8
December	Pycnonotus xanthorrhous	Cinnamomum camphora	3	11	2
December	Pycnonotus xanthorrhous	Cinnamomum camphora	1	13	3
December	Pycnonotus sinensis	Cinnamomum camphora	2	85	7
December	Turdus merula	Cinnamomum camphora	5	18	3
December	Pycnonotus sinensis	Cinnamomum camphora	2	7	1
December	Pycnonotus sinensis	Cinnamomum camphora	1	73	7
December	Ixos mcclellandii	Cinnamomum camphora	4	3	1
December	Hemixos castanonotus	Cinnamomum camphora	2	37	2
December	Urocissa erythrorhyncha	Cinnamomum camphora	3	39	4
December	Hemixos castanonotus	Cinnamomum camphora	7	54	6
December	Hemixos castanonotus	Cinnamomum camphora	2	17	1
December	Parus venustulus	Cinnamomum camphora	6	7	1
December	Turdus merula	Cinnamomum camphora	2	23	2
December	Turdus merula	Cinnamomum camphora	1	45	6
December	Pycnonotus xanthorrhous	Cinnamomum camphora	5	22	3
December	Pycnonotus xanthorrhous	Cinnamomum camphora	3	16	3
December	Turdus merula	Cinnamomum camphora	6	31	3
December	Pycnonotus xanthorrhous	Cayratia japonica	3	9	1
December	Pycnonotus sinensis	Cayratia japonica	1	7	1
December	Pycnonotus xanthorrhous	Cayratia japonica	2	19	3
December	Zosterops japonicus	Magnolia grandiflora	5	11	1
December	Pycnonotus xanthorrhous	Magnolia grandiflora	6	34	2
December	Parus venustulus	Magnolia grandiflora	1	11	1
December	Pycnonotus sinensis	Cinnamomum camphora	2	13	1
December	Pycnonotus xanthorrhous	Cinnamomum camphora	4	28	4
December	Ixos mcclellandii	Cinnamomum camphora	7	40	5
December	Hemixos castanonotus	Cinnamomum camphora	3	4	1
December	Ixos mcclellandii	Cinnamomum camphora	2	17	3
December	Pycnonotus xanthorrhous	Cinnamomum camphora	3	21	3
December	Pycnonotus sinensis	Cinnamomum camphora	1	5	1
December	Turdus merula	Cinnamomum camphora	5	51	8
December	Pycnonotus xanthorrhous	Cinnamomum camphora	6	25	3
December	Pycnonotus sinensis	Cinnamomum camphora	3	17	2
December	Hemixos castanonotus	Cinnamomum camphora	3	58	4
December	Pycnonotus sinensis	Cinnamomum camphora	2	13	2
December	Pycnonotus jocosus	Magnolia grandiflora	6	25	5
December	Ixos mcclellandii	Cinnamomum camphora	9	32	3
December	Pycnonotus xanthorrhous	Cinnamomum camphora	4	28	2
December	Turdus merula	Cinnamomum camphora	3	39	4
December	Hemixos castanonotus	Cinnamomum camphora	7	53	4
December	Pycnonotus xanthorrhous	Cinnamomum camphora	2	24	2
December	Pycnonotus xanthorrhous	Ilex cornuta	1	18	2
December	Ixos mcclellandii	Cinnamomum camphora	3	36	3
December	Hemixos castanonotus	Cinnamomum camphora	6	12	2
December	Pycnonotus xanthorrhous	Cinnamomum camphora	12	64	8
December	Pycnonotus sinensis	Cinnamomum camphora	16	22	3
December	Pycnonotus jocosus	Cinnamomum camphora	4	49	5
December	Pycnonotus sinensis	Cinnamomum camphora	2	24	2
December	Pycnonotus sinensis	Cinnamomum camphora	1	28	3
December	Pycnonotus xanthorrhous	Cinnamomum camphora	4	37	6
December	Hemixos castanonotus	Cinnamomum camphora	1	51	2
December	Parus venustulus	Cinnamomum camphora	7	18	1
December	Parus major	Cinnamomum camphora	11	21	3
December	Pycnonotus sinensis	Cinnamomum camphora	3	40	3
December	Turdus merula	Cinnamomum camphora	8	32	2
December	Turdus cardis	Cinnamomum camphora	6	16	3
December	Hemixos castanonotus	Cinnamomum camphora	13	37	3
December	Pycnonotus xanthorrhous	Cinnamomum camphora	5	11	2
December	Pycnonotus sinensis	Cinnamomum camphora	3	28	5
December	Pycnonotus xanthorrhous	Cayratia japonica	1	7	1
December	Pycnonotus xanthorrhous	Cayratia japonica	3	36	3
December	Turdus hortulorum	Cayratia japonica	1	3	1
December	Pycnonotus xanthorrhous	Cayratia japonica	2	19	1
December	Pycnonotus xanthorrhous	Cayratia japonica	1	22	4
December	Turdus merula	Cayratia japonica	3	7	2
December	Urocissa erythrorhyncha	Cayratia japonica	1	5	1
December	Urocissa erythrorhyncha	Cinnamomum camphora	2	14	2
December	Pycnonotus xanthorrhous	Ilex cornuta	1	6	1
December	Turdus hortulorum	Ilex cornuta	1	11	2
December	Turdus merula	Cinnamomum camphora	2	5	1
December	Pycnonotus sinensis	Cinnamomum camphora	14	23	4
December	Pycnonotus xanthorrhous	Cinnamomum camphora	7	5	1
December	Pycnonotus xanthorrhous	Cayratia japonica	2	3	1
December	Turdus merula	Cinnamomum camphora	6	45	5
December	Turdus cardis	Cinnamomum camphora	5	18	2
December	Pycnonotus xanthorrhous	Cinnamomum camphora	1	4	1
December	Pycnonotus sinensis	Cinnamomum camphora	7	35	3
December	Pycnonotus xanthorrhous	Cinnamomum camphora	5	20	3
December	Ixos mcclellandii	Cinnamomum camphora	3	24	4
December	Ixos mcclellandii	Tetrastigma planicaule	1	28	5
December	Urocissa erythrorhyncha	Tetrastigma planicaule	1	11	2
December	Pycnonotus xanthorrhous	Cinnamomum camphora	2	23	3
December	Turdus merula	Cinnamomum camphora	4	31	6
December	Pycnonotus xanthorrhous	Cinnamomum camphora	7	52	7
December	Pycnonotus sinensis	Cinnamomum camphora	11	28	4
December	Pycnonotus xanthorrhous	Cinnamomum camphora	3	5	1
December	Parus major	Cayratia japonica	1	3	1
December	Pycnonotus xanthorrhous	Cinnamomum camphora	5	58	6
December	Urocissa erythrorhyncha	Cinnamomum camphora	1	5	1
December	Turdus cardis	Cinnamomum camphora	2	29	2
December	Hemixos castanonotus	Cinnamomum camphora	4	15	2
December	Parus venustulus	Cinnamomum camphora	7	3	1
December	Hemixos castanonotus	Cinnamomum camphora	2	39	5
December	Zosterops japonicus	Cinnamomum camphora	3	6	2
December	Pycnonotus xanthorrhous	Cayratia japonica	1	11	2
December	Pycnonotus sinensis	Cayratia japonica	3	4	1
December	Pycnonotus jocosus	Cayratia japonica	5	19	6
December	Parus major	Ilex cornuta	4	23	3
December	Ixos mcclellandii	Cinnamomum camphora	1	7	1
December	Pycnonotus sinensis	Cinnamomum camphora	13	33	5
December	Pycnonotus xanthorrhous	Cinnamomum camphora	8	53	7
December	Turdus merula	Cinnamomum camphora	4	78	8
December	Pycnonotus xanthorrhous	Cinnamomum camphora	5	7	2
December	Pycnonotus jocosus	Cayratia japonica	3	11	4
December	Pycnonotus sinensis	Cinnamomum camphora	3	21	3
December	Pycnonotus sinensis	Cinnamomum camphora	7	52	7
December	Turdus merula	Cinnamomum camphora	1	51	6
December	Pycnonotus sinensis	Cinnamomum camphora	1	3	1
December	Pycnonotus xanthorrhous	Cinnamomum camphora	5	42	5
December	Pycnonotus sinensis	Cinnamomum camphora	6	6	2
December	Pycnonotus xanthorrhous	Cinnamomum camphora	5	18	3
December	Pycnonotus xanthorrhous	Cinnamomum camphora	1	20	6
December	Pycnonotus jocosus	Cayratia japonica	7	27	5
December	Turdus merula	Cinnamomum camphora	1	45	6
December	Pycnonotus xanthorrhous	Cinnamomum camphora	1	36	6
December	Ixos mcclellandii	Cinnamomum camphora	3	9	2
December	Hemixos castanonotus	Cinnamomum camphora	9	14	3
December	Pycnonotus xanthorrhous	Cinnamomum camphora	7	27	4
December	Turdus merula	Cinnamomum camphora	1	11	2
December	Pycnonotus sinensis	Cinnamomum camphora	3	34	2
December	Parus venustulus	Cinnamomum camphora	8	5	1
December	Pycnonotus xanthorrhous	Cinnamomum camphora	4	9	2
December	Zosterops japonicus	Cayratia japonica	6	11	1
December	Parus venustulus	Cinnamomum camphora	5	27	1
December	Pycnonotus xanthorrhous	Cinnamomum camphora	2	6	1
December	Pycnonotus sinensis	Cinnamomum camphora	3	61	7
December	Pycnonotus sinensis	Cinnamomum camphora	5	32	5
December	Pycnonotus xanthorrhous	Cinnamomum camphora	2	16	1
December	Turdus merula	Cinnamomum camphora	7	48	8
December	Turdus merula	Cinnamomum camphora	2	53	10
December	Turdus merula	Cinnamomum camphora	3	18	3
December	Pycnonotus xanthorrhous	Cayratia japonica	2	3	1
December	Pycnonotus sinensis	Magnolia grandiflora	2	5	1
December	Parus venustulus	Magnolia grandiflora	3	18	3
December	Urocissa erythrorhyncha	Magnolia grandiflora	1	11	2
December	Pycnonotus jocosus	Magnolia grandiflora	5	21	4
December	Pycnonotus xanthorrhous	Cayratia japonica	7	43	2
December	Pycnonotus xanthorrhous	Cayratia japonica	4	56	5
December	Pycnonotus xanthorrhous	Schefflera arboricola	2	12	1
December	Hemixos castanonotus	Schefflera arboricola	1	8	1
December	Turdus hortulorum	Schefflera arboricola	2	16	2
December	Pycnonotus xanthorrhous	Tetrastigma planicaule	4	17	3
December	Urocissa erythrorhyncha	Tetrastigma planicaule	1	7	1
December	Hemixos castanonotus	Cinnamomum camphora	5	41	4
December	Pycnonotus sinensis	Cinnamomum camphora	7	22	3
December	Turdus hortulorum	Cinnamomum camphora	1	29	6
December	Ixos mcclellandii	Cinnamomum camphora	2	16	1
December	Hemixos castanonotus	Cinnamomum camphora	3	10	3
December	Pycnonotus sinensis	Cinnamomum camphora	5	14	3
December	Ixos mcclellandii	Tetrastigma planicaule	6	32	4
January	Pycnonotus sinensis	Cayratia japonica	1	47	8
January	Pycnonotus xanthorrhous	Cayratia japonica	2	51	10
January	Pycnonotus xanthorrhous	Cayratia japonica	4	20	2
January	Zosterops japonicus	Cayratia japonica	3	3	1
January	Pycnonotus sinensis	Cayratia japonica	5	11	2
January	Zosterops japonicus	Cayratia japonica	6	32	8
January	Pycnonotus xanthorrhous	Cayratia japonica	7	14	3
January	Streptopelia orientalis	Cayratia japonica	2	24	6
January	Pycnonotus xanthorrhous	Cayratia japonica	5	21	2
January	Pycnonotus xanthorrhous	Cayratia japonica	2	6	3
January	Turdus merula	Cayratia japonica	4	8	3
January	Zosterops japonicus	Cayratia japonica	4	5	2
January	Pycnonotus sinensis	Cayratia japonica	2	26	2
January	Zosterops japonicus	Cayratia japonica	7	8	4
January	Pycnonotus xanthorrhous	Cayratia japonica	6	36	5
January	Turdus merula	Cayratia japonica	11	9	3
January	Parus major	Cayratia japonica	1	13	1
January	Pycnonotus sinensis	Cayratia japonica	3	57	3
January	Pycnonotus xanthorrhous	Cayratia japonica	2	45	6
January	Zosterops japonicus	Cayratia japonica	3	6	3
January	Turdus merula	Cayratia japonica	7	11	5
January	Zosterops japonicus	Cayratia japonica	5	18	3
January	Pycnonotus sinensis	Cayratia japonica	8	3	1
January	Pycnonotus xanthorrhous	Cayratia japonica	5	6	2
January	Pycnonotus xanthorrhous	Cayratia japonica	3	2	1
January	Turdus merula	Cayratia japonica	6	5	2
January	Urocissa erythrorhyncha	Cayratia japonica	2	12	4
January	Zosterops japonicus	Cayratia japonica	10	5	2
January	Pycnonotus xanthorrhous	Cayratia japonica	1	18	3
January	Zosterops japonicus	Cayratia japonica	3	7	1
January	Pycnonotus xanthorrhous	Cayratia japonica	4	2	1
January	Pycnonotus xanthorrhous	Cayratia japonica	2	41	8
January	Pycnonotus sinensis	Cayratia japonica	5	14	3
January	Ixos mcclellandii	Cayratia japonica	4	3	1
January	Pycnonotus xanthorrhous	Cayratia japonica	6	32	5
January	Pycnonotus xanthorrhous	Cayratia japonica	1	2	1
January	Zosterops japonicus	Cayratia japonica	8	12	1
January	Turdus merula	Cayratia japonica	3	9	2
January	Pycnonotus xanthorrhous	Cayratia japonica	6	54	6
January	Pycnonotus sinensis	Cayratia japonica	2	15	3
January	Ixos mcclellandii	Cayratia japonica	2	41	8
January	Zosterops japonicus	Cayratia japonica	9	32	6
January	Zosterops japonicus	Cayratia japonica	2	14	3
January	Pycnonotus xanthorrhous	Cayratia japonica	4	9	2
January	Turdus merula	Cayratia japonica	2	28	5
January	Zosterops japonicus	Cayratia japonica	1	7	1
January	Pycnonotus sinensis	Cayratia japonica	2	26	2
January	Streptopelia orientalis	Cayratia japonica	1	26	6
January	Pycnonotus sinensis	Cayratia japonica	4	16	3
January	Pycnonotus xanthorrhous	Cayratia japonica	3	27	3
January	Hemixos castanonotus	Cayratia japonica	7	9	3
January	Turdus merula	Cayratia japonica	4	36	5
January	Zosterops japonicus	Cayratia japonica	2	22	2
January	Urocissa erythrorhyncha	Cayratia japonica	3	7	3
January	Pycnonotus sinensis	Cayratia japonica	2	3	1
January	Ixos mcclellandii	Cayratia japonica	4	24	5
January	Pycnonotus sinensis	Cayratia japonica	5	23	3
January	Pycnonotus xanthorrhous	Cayratia japonica	5	4	2
January	Zosterops japonicus	Cayratia japonica	9	14	1
January	Hemixos castanonotus	Cayratia japonica	6	8	2
January	Pycnonotus jocosus	Cayratia japonica	4	3	1
January	Pycnonotus xanthorrhous	Cayratia japonica	6	14	3
January	Pycnonotus sinensis	Cayratia japonica	3	12	1
January	Ixos mcclellandii	Cayratia japonica	2	3	1
January	Turdus merula	Cayratia japonica	5	7	3
January	Pycnonotus xanthorrhous	Cayratia japonica	8	3	1
January	Zosterops japonicus	Cayratia japonica	2	26	2
January	Hemixos castanonotus	Cayratia japonica	3	22	2
January	Parus major	Cayratia japonica	1	5	2
January	Pycnonotus xanthorrhous	Cayratia japonica	4	34	3
January	Pycnonotus sinensis	Cayratia japonica	2	44	11
January	Urocissa erythrorhyncha	Cayratia japonica	4	22	6
January	Turdus merula	Cayratia japonica	5	11	3
January	Pycnonotus xanthorrhous	Cayratia japonica	8	15	3
January	Streptopelia orientalis	Cayratia japonica	2	18	4
January	Pycnonotus xanthorrhous	Cayratia japonica	3	6	1
January	Pycnonotus jocosus	Cayratia japonica	5	17	5
January	Urocissa erythrorhyncha	Cayratia japonica	7	19	2
January	Zosterops japonicus	Cayratia japonica	3	42	8
January	Pycnonotus xanthorrhous	Cayratia japonica	2	33	5
January	Hemixos castanonotus	Cayratia japonica	6	14	2
January	Pycnonotus sinensis	Cayratia japonica	2	27	4
January	Pycnonotus xanthorrhous	Cayratia japonica	5	36	3
January	Ixos mcclellandii	Cayratia japonica	4	53	9
January	Zosterops japonicus	Cayratia japonica	8	49	5
January	Zosterops japonicus	Cayratia japonica	2	13	1
January	Turdus merula	Cayratia japonica	6	14	2
January	Turdus merula	Cayratia japonica	7	5	2
January	Pycnonotus xanthorrhous	Cayratia japonica	6	14	4
January	Pycnonotus xanthorrhous	Cayratia japonica	2	31	8
January	Urocissa erythrorhyncha	Cayratia japonica	4	27	5
January	Hemixos castanonotus	Cayratia japonica	4	13	2
January	Ixos mcclellandii	Cayratia japonica	5	22	3
January	Parus major	Cayratia japonica	2	6	1
January	Pycnonotus sinensis	Cayratia japonica	7	25	7
January	Urocissa erythrorhyncha	Cayratia japonica	3	13	3
January	Turdus merula	Cayratia japonica	7	19	2
January	Pycnonotus jocosus	Cayratia japonica	2	21	6
January	Parus major	Cayratia japonica	6	52	2
January	Hemixos castanonotus	Cayratia japonica	2	35	5
January	Pycnonotus sinensis	Cayratia japonica	4	11	2
January	Pycnonotus xanthorrhous	Cayratia japonica	5	24	6
January	Ixos mcclellandii	Cayratia japonica	2	16	4
January	Zosterops japonicus	Cayratia japonica	3	8	1
January	Turdus merula	Cayratia japonica	2	26	3
January	Pycnonotus xanthorrhous	Cayratia japonica	4	17	2
January	Hemixos castanonotus	Cayratia japonica	3	22	5
January	Urocissa erythrorhyncha	Cayratia japonica	1	36	4
January	Pycnonotus xanthorrhous	Cayratia japonica	3	26	4
January	Hemixos castanonotus	Cayratia japonica	2	34	3
January	Zosterops japonicus	Cayratia japonica	2	19	5
January	Pycnonotus xanthorrhous	Cayratia japonica	1	28	4
January	Pycnonotus sinensis	Cayratia japonica	3	53	6
January	Ixos mcclellandii	Cinnamomum camphora	2	5	6
January	Hemixos castanonotus	Cinnamomum camphora	1	3	1
January	Ixos mcclellandii	Schefflera arboricola	1	35	4
January	Turdus hortulorum	Schefflera arboricola	1	13	2
January	Parus venustulus	Cinnamomum camphora	7	6	1
January	Pycnonotus xanthorrhous	Cinnamomum camphora	6	41	6
January	Turdus hortulorum	Cinnamomum camphora	1	5	1
January	Pycnonotus sinensis	Cinnamomum camphora	12	37	5
January	Ixos mcclellandii	Cinnamomum camphora	7	32	3
January	Hemixos castanonotus	Cinnamomum camphora	5	24	5
January	Ixos mcclellandii	Schefflera arboricola	4	14	3
January	Pycnonotus xanthorrhous	Schefflera arboricola	5	12	2
January	Hemixos castanonotus	Schefflera arboricola	6	44	3
January	Zosterops japonicus	Schefflera arboricola	5	29	4
January	Hemixos castanonotus	Schefflera arboricola	3	15	2
January	Zosterops japonicus	Schefflera arboricola	2	14	1
January	Zosterops japonicus	Cayratia japonica	4	9	3
January	Pycnonotus xanthorrhous	Cayratia japonica	2	41	3
January	Parus venustulus	Cayratia japonica	1	21	1
January	Pycnonotus xanthorrhous	Ilex chinensis	8	43	11
January	Pycnonotus sinensis	Ilex chinensis	3	7	2
January	Parus venustulus	Ilex chinensis	1	12	2
January	Zosterops japonicus	Schefflera arboricola	3	14	2
January	Hemixos castanonotus	Schefflera arboricola	5	54	6
January	Pycnonotus sinensis	Schefflera arboricola	2	11	3
January	Pycnonotus xanthorrhous	Cinnamomum camphora	7	32	6
January	Pycnonotus sinensis	Cinnamomum camphora	4	41	8
January	Hemixos castanonotus	Cinnamomum camphora	5	8	3
January	Pycnonotus xanthorrhous	Cinnamomum camphora	2	28	7
January	Parus venustulus	Cinnamomum camphora	6	13	2
January	Pycnonotus xanthorrhous	Cinnamomum camphora	5	67	6
January	Pycnonotus sinensis	Cinnamomum camphora	4	29	3
January	Turdus cardis	Cinnamomum camphora	1	34	7
January	Ixos mcclellandii	Ilex chinensis	2	26	5
January	Parus venustulus	Ilex chinensis	1	16	2
January	Hemixos castanonotus	Schefflera arboricola	4	39	8
January	Pycnonotus xanthorrhous	Schefflera arboricola	2	6	1
January	Hemixos castanonotus	Schefflera arboricola	6	27	5
January	Hemixos castanonotus	Cinnamomum camphora	4	16	3
January	Hemixos castanonotus	Ilex chinensis	3	26	5
January	Parus venustulus	Ilex chinensis	1	23	2
January	Hemixos castanonotus	Schefflera arboricola	5	65	8
January	Zosterops japonicus	Schefflera arboricola	1	5	1
January	Pycnonotus xanthorrhous	Schefflera arboricola	2	7	2
January	Hemixos castanonotus	Ilex chinensis	3	13	3
January	Hemixos castanonotus	Ilex chinensis	2	17	5
January	Pycnonotus xanthorrhous	Ilex chinensis	4	5	2
January	Pycnonotus sinensis	Cinnamomum camphora	4	61	6
January	Pycnonotus xanthorrhous	Cinnamomum camphora	7	24	5
January	Turdus merula	Ilex chinensis	6	16	5
January	Turdus cardis	Ilex chinensis	7	51	8
January	Turdus hortulorum	Ilex chinensis	2	5	1
January	Turdus merula	Schefflera arboricola	2	14	2
January	Pycnonotus xanthorrhous	Ilex cornuta	2	23	3
January	Pycnonotus sinensis	Ilex cornuta	3	32	4
January	Pycnonotus xanthorrhous	Tetrastigma planicaule	5	91	14
January	Zosterops japonicus	Schefflera arboricola	3	47	4
January	Hemixos castanonotus	Ilex chinensis	7	39	6
January	Pycnonotus xanthorrhous	Ilex chinensis	8	52	5
January	Pycnonotus xanthorrhous	Ilex chinensis	5	17	3
January	Pycnonotus sinensis	Ilex chinensis	3	6	2
January	Ixos mcclellandii	Ilex chinensis	2	19	5
January	Pycnonotus xanthorrhous	Ilex chinensis	3	78	8
January	Pycnonotus sinensis	Bischofia javanica	4	6	1
January	Pycnonotus xanthorrhous	Bischofia javanica	6	23	3
January	Hemixos castanonotus	Bischofia javanica	2	28	4
January	Urocissa erythrorhyncha	Bischofia javanica	1	8	1
January	Pycnonotus jocosus	Bischofia javanica	4	19	5
January	Pycnonotus xanthorrhous	Cinnamomum camphora	7	7	2
January	Pycnonotus sinensis	Cinnamomum camphora	3	11	2
January	Pycnonotus xanthorrhous	Ilex cornuta	2	4	1
January	Pycnonotus xanthorrhous	Cinnamomum camphora	1	42	4
January	Pycnonotus xanthorrhous	Cinnamomum camphora	2	42	7
January	Ixos mcclellandii	Cinnamomum camphora	2	39	6
January	Ixos mcclellandii	Cinnamomum camphora	4	7	2
January	Pycnonotus xanthorrhous	Cinnamomum camphora	6	21	2
January	Pycnonotus sinensis	Cinnamomum camphora	7	13	2
January	Turdus merula	Cinnamomum camphora	3	25	2
January	Urocissa erythrorhyncha	Cinnamomum camphora	2	7	1
January	Hemixos castanonotus	Schefflera arboricola	7	54	8
January	Hemixos castanonotus	Schefflera arboricola	5	23	5
January	Zosterops japonicus	Schefflera arboricola	2	17	3
January	Pycnonotus xanthorrhous	Schefflera arboricola	1	5	1
January	Pycnonotus xanthorrhous	Cinnamomum camphora	3	75	12
January	Pycnonotus sinensis	Cinnamomum camphora	2	21	6
January	Pycnonotus xanthorrhous	Cinnamomum camphora	6	14	2
January	Pycnonotus sinensis	Cinnamomum camphora	3	5	1
January	Turdus merula	Cinnamomum camphora	4	9	2
January	Hemixos castanonotus	Schefflera arboricola	5	37	4
January	Pycnonotus xanthorrhous	Cinnamomum camphora	7	13	1
January	Pycnonotus sinensis	Cinnamomum camphora	2	3	1
January	Pycnonotus xanthorrhous	Ilex chinensis	3	24	3
January	Pycnonotus sinensis	Ilex chinensis	5	5	2
January	Turdus merula	Ilex chinensis	3	31	6
January	Hemixos castanonotus	Tetrastigma planicaule	3	16	4
January	Pycnonotus xanthorrhous	Tetrastigma planicaule	5	7	3
January	Ixos mcclellandii	Ilex cornuta	1	9	2
January	Turdus merula	Ilex chinensis	11	48	13
January	Pycnonotus xanthorrhous	Ilex chinensis	4	31	5
January	Pycnonotus sinensis	Ilex chinensis	3	57	6
January	Ixos mcclellandii	Ilex chinensis	5	18	3
January	Ixos mcclellandii	Ilex cornuta	2	23	5
January	Turdus merula	Cinnamomum camphora	9	21	2
January	Pycnonotus xanthorrhous	Cinnamomum camphora	5	14	1
January	Pycnonotus sinensis	Cinnamomum camphora	3	5	1
January	Hemixos castanonotus	Cinnamomum camphora	2	11	1
January	Pycnonotus xanthorrhous	Cinnamomum camphora	1	15	2
January	Zosterops japonicus	Cinnamomum camphora	9	71	7
January	Ixos mcclellandii	Cinnamomum camphora	2	8	2
January	Pycnonotus xanthorrhous	Cinnamomum camphora	8	12	1
January	Pycnonotus sinensis	Cinnamomum camphora	4	5	1
January	Pycnonotus xanthorrhous	Cinnamomum camphora	6	43	6
January	Pycnonotus sinensis	Cinnamomum camphora	4	29	3
January	Hemixos castanonotus	Cinnamomum camphora	3	21	12
January	Ixos mcclellandii	Cinnamomum camphora	2	44	5
January	Pycnonotus xanthorrhous	Cayratia japonica	7	36	7
January	Pycnonotus sinensis	Cayratia japonica	5	29	2
January	Parus venustulus	Cayratia japonica	2	19	3
January	Hemixos castanonotus	Schefflera arboricola	7	54	10
January	Zosterops japonicus	Schefflera arboricola	4	29	5
January	Pycnonotus sinensis	Schefflera arboricola	2	32	7
January	Turdus cardis	Schefflera arboricola	2	14	3
January	Ixos mcclellandii	Tetrastigma planicaule	3	19	4
January	Hemixos castanonotus	Tetrastigma planicaule	5	5	2
January	Pycnonotus xanthorrhous	Ilex chinensis	9	15	4
January	Pycnonotus sinensis	Ilex chinensis	12	19	3
January	Turdus merula	Ilex chinensis	6	34	6
January	Pycnonotus xanthorrhous	Bischofia javanica	3	2	1
January	Zosterops japonicus	Bischofia javanica	7	18	7
January	Urocissa erythrorhyncha	Bischofia javanica	2	11	4
January	Pycnonotus jocosus	Bischofia javanica	6	23	5
January	Pycnonotus xanthorrhous	Cinnamomum camphora	4	8	2
January	Pycnonotus sinensis	Cinnamomum camphora	5	6	1
January	Turdus merula	Cinnamomum camphora	9	3	1
January	Ixos mcclellandii	Cinnamomum camphora	2	5	2
January	Pycnonotus xanthorrhous	Cinnamomum camphora	3	17	2
January	Pycnonotus sinensis	Cinnamomum camphora	7	32	8
January	Hemixos castanonotus	Cinnamomum camphora	2	52	3
January	Ixos mcclellandii	Cinnamomum camphora	3	30	3
January	Pycnonotus xanthorrhous	Cayratia japonica	6	45	4
January	Pycnonotus sinensis	Cayratia japonica	2	31	4
January	Hemixos castanonotus	Tetrastigma planicaule	4	19	6
January	Pycnonotus xanthorrhous	Tetrastigma planicaule	7	31	10
January	Turdus cardis	Tetrastigma planicaule	2	19	3
January	Ixos mcclellandii	Cinnamomum camphora	2	46	9
January	Pycnonotus sinensis	Cayratia japonica	1	12	5
January	Hemixos castanonotus	Cinnamomum camphora	6	71	18
January	Hemixos castanonotus	Ilex chinensis	4	17	5
January	Turdus merula	Ilex chinensis	6	38	12
January	Turdus merula	Cinnamomum camphora	4	11	2
January	Ixos mcclellandii	Cinnamomum camphora	1	4	1
January	Zosterops japonicus	Cinnamomum camphora	2	14	2
January	Hemixos castanonotus	Cinnamomum camphora	3	21	6
January	Ixos mcclellandii	Cinnamomum camphora	1	22	8
January	Zosterops japonicus	Cinnamomum camphora	3	27	2
January	Hemixos castanonotus	Cinnamomum camphora	2	74	6
January	Ixos mcclellandii	Cinnamomum camphora	1	9	2
January	Pycnonotus xanthorrhous	Ilex cornuta	4	8	3
January	Hemixos castanonotus	Bischofia javanica	3	12	2
January	Ixos mcclellandii	Bischofia javanica	2	14	2
January	Urocissa erythrorhyncha	Bischofia javanica	1	11	3
January	Turdus merula	Bischofia javanica	1	8	1
January	Turdus merula	Bischofia javanica	1	15	2
January	Pycnonotus xanthorrhous	Cinnamomum camphora	7	5	2
January	Turdus merula	Ilex chinensis	4	69	13
January	Turdus cardis	Ilex chinensis	1	12	6
January	Pycnonotus sinensis	Ilex chinensis	6	43	8
January	Ixos mcclellandii	Bischofia javanica	5	31	5
January	Urocissa erythrorhyncha	Bischofia javanica	1	17	3
January	Turdus merula	Cinnamomum camphora	8	5	1
January	Pycnonotus xanthorrhous	Cinnamomum camphora	6	3	1
January	Pycnonotus sinensis	Cinnamomum camphora	3	9	2
January	Hemixos castanonotus	Cinnamomum camphora	2	53	4
January	Zosterops japonicus	Cinnamomum camphora	6	64	3
January	Pycnonotus xanthorrhous	Bischofia javanica	7	36	5
January	Pycnonotus jocosus	Bischofia javanica	4	23	3
January	Pycnonotus sinensis	Bischofia javanica	5	16	5
January	Hemixos castanonotus	Bischofia javanica	1	27	8
January	Ixos mcclellandii	Bischofia javanica	2	11	5
January	Turdus merula	Ilex chinensis	1	22	6
January	Zosterops japonicus	Ilex chinensis	5	7	2
February	Hemixos castanonotus	Cinnamomum camphora	3	66	4
February	Zosterops japonicus	Cinnamomum camphora	2	27	3
February	Ixos mcclellandii	Bischofia javanica	1	69	11
February	Pycnonotus xanthorrhous	Bischofia javanica	2	24	4
February	Pycnonotus xanthorrhous	Schefflera arboricola	3	9	2
February	Zosterops japonicus	Schefflera arboricola	5	20	5
February	Turdus cardis	Schefflera arboricola	2	11	3
February	Pycnonotus xanthorrhous	Bischofia javanica	1	5	1
February	Hemixos castanonotus	Bischofia javanica	1	7	2
February	Parus venustulus	Bischofia javanica	1	13	2
February	Urocissa erythrorhyncha	Bischofia javanica	1	19	3
February	Turdus cardis	Bischofia javanica	1	9	1
February	Turdus cardis	Bischofia javanica	2	32	5
February	Pycnonotus xanthorrhous	Ilex chinensis	6	71	9
February	Turdus merula	Ilex chinensis	5	47	12
February	Turdus cardis	Ilex chinensis	1	13	5
February	Turdus merula	Cinnamomum camphora	9	84	7
February	Ixos mcclellandii	Cinnamomum camphora	4	33	4
February	Pycnonotus xanthorrhous	Bischofia javanica	2	45	6
February	Pycnonotus xanthorrhous	Bischofia javanica	2	46	6
February	Pycnonotus xanthorrhous	Bischofia javanica	3	23	5
February	Pycnonotus jocosus	Bischofia javanica	7	31	4
February	Turdus cardis	Bischofia javanica	1	8	2
February	Hemixos castanonotus	Tetrastigma planicaule	1	22	4
February	Zosterops japonicus	Ilex chinensis	4	16	2
February	Hemixos castanonotus	Ilex chinensis	7	57	12
February	Hemixos castanonotus	Tetrastigma planicaule	5	83	17
February	Hemixos castanonotus	Bischofia javanica	2	6	2
February	Turdus cardis	Bischofia javanica	2	12	3
February	Turdus merula	Ilex chinensis	5	52	8
February	Turdus merula	Ilex chinensis	2	7	2
February	Ixos mcclellandii	Ilex chinensis	3	14	4
February	Pycnonotus sinensis	Ilex chinensis	2	24	2
February	Turdus merula	Ilex chinensis	7	61	7
February	Pycnonotus xanthorrhous	Ilex chinensis	6	41	8
February	Zosterops japonicus	Ilex chinensis	8	52	5
February	Hemixos castanonotus	Ilex chinensis	1	2	1
February	Hemixos castanonotus	Ilex chinensis	2	29	5
February	Hemixos castanonotus	Ilex chinensis	2	46	9
February	Pycnonotus xanthorrhous	Ilex chinensis	1	8	2
February	Pycnonotus xanthorrhous	Bischofia javanica	1	20	1
February	Pycnonotus sinensis	Bischofia javanica	1	36	2
February	Hemixos castanonotus	Ilex chinensis	2	74	2
February	Pycnonotus sinensis	Ilex chinensis	1	15	2
February	Turdus merula	Viburnum odoratissimum	4	21	5
February	Pycnonotus jocosus	Viburnum odoratissimum	3	19	4
February	Hemixos castanonotus	Ilex chinensis	1	8	3
February	Pycnonotus xanthorrhous	Ilex chinensis	1	2	1
February	Pycnonotus xanthorrhous	Ilex chinensis	1	23	4
February	Pycnonotus xanthorrhous	Ilex chinensis	13	82	7
February	Pycnonotus sinensis	Ilex chinensis	7	27	4
February	Hemixos castanonotus	Ilex chinensis	5	21	3
February	Turdus merula	Ilex chinensis	8	29	6
February	Zosterops japonicus	Ilex chinensis	9	13	2
February	Pycnonotus xanthorrhous	Bischofia javanica	2	5	1
February	Zosterops japonicus	Bischofia javanica	5	14	2
February	Pycnonotus xanthorrhous	Bischofia javanica	1	23	8
February	Hemixos castanonotus	Bischofia javanica	4	44	6
February	Zosterops japonicus	Ilex chinensis	3	27	5
February	Pycnonotus sinensis	Ilex chinensis	1	18	4
February	Pycnonotus xanthorrhous	Bischofia javanica	6	12	3
February	Pycnonotus sinensis	Bischofia javanica	3	23	4
February	Ixos mcclellandii	Bischofia javanica	6	11	2
February	Ixos mcclellandii	Tetrastigma planicaule	2	16	4
February	Turdus merula	Viburnum odoratissimum	2	21	5
February	Pycnonotus jocosus	Viburnum odoratissimum	3	15	4
February	Pycnonotus xanthorrhous	Ilex chinensis	9	37	6
February	Pycnonotus sinensis	Ilex chinensis	7	20	3
February	Zosterops japonicus	Ilex chinensis	12	9	1
February	Turdus merula	Ilex chinensis	8	26	7
February	Hemixos castanonotus	Ilex chinensis	6	18	2
February	Ixos mcclellandii	Ilex chinensis	7	4	1
February	Zosterops japonicus	Ilex chinensis	6	7	1
February	Pycnonotus xanthorrhous	Bischofia javanica	1	22	3
February	Ixos mcclellandii	Bischofia javanica	7	17	3
February	Zosterops japonicus	Viburnum odoratissimum	4	56	7
February	Pycnonotus xanthorrhous	Viburnum odoratissimum	2	21	3
February	Hemixos castanonotus	Viburnum odoratissimum	5	41	8
February	Pycnonotus xanthorrhous	Viburnum odoratissimum	3	21	5
February	Turdus merula	Viburnum odoratissimum	1	11	2
February	Urocissa erythrorhyncha	Viburnum odoratissimum	1	9	1
February	Urocissa erythrorhyncha	Viburnum odoratissimum	1	21	3
February	Pycnonotus xanthorrhous	Tetrastigma planicaule	3	31	2
February	Hemixos castanonotus	Tetrastigma planicaule	2	6	1
February	Hemixos castanonotus	Bischofia javanica	6	24	3
February	Pycnonotus xanthorrhous	Bischofia javanica	5	36	2
March	Zosterops japonicus	Osmanthus fragrans	11	83	11
March	Zosterops japonicus	Osmanthus fragrans	7	17	3
March	Pycnonotus jocosus	Osmanthus fragrans	8	66	7
March	Hemixos castanonotus	Osmanthus fragrans	2	39	3
March	Ixos mcclellandii	Tetrastigma planicaule	3	28	4
March	Hemixos castanonotus	Schefflera arboricola	5	20	3
March	Zosterops japonicus	Osmanthus fragrans	12	14	2
March	Pycnonotus xanthorrhous	Osmanthus fragrans	6	13	2
March	Hemixos castanonotus	Osmanthus fragrans	5	26	3
March	Zosterops japonicus	Osmanthus fragrans	9	42	5
March	Zosterops japonicus	Osmanthus fragrans	13	23	6
March	Pycnonotus xanthorrhous	Osmanthus fragrans	1	11	2
March	Zosterops japonicus	Osmanthus fragrans	17	75	13
March	Ixos mcclellandii	Osmanthus fragrans	3	16	2
March	Zosterops japonicus	Osmanthus fragrans	4	28	9
March	Zosterops japonicus	Osmanthus fragrans	9	13	5
March	Pycnonotus xanthorrhous	Osmanthus fragrans	5	19	2
March	Zosterops japonicus	Osmanthus fragrans	15	27	7
March	Pycnonotus xanthorrhous	Osmanthus fragrans	4	31	2
March	Pycnonotus jocosus	Osmanthus fragrans	4	4	1
March	Zosterops japonicus	Osmanthus fragrans	3	20	4
March	Zosterops japonicus	Osmanthus fragrans	7	41	9
March	Pycnonotus xanthorrhous	Osmanthus fragrans	2	20	1
March	Pycnonotus sinensis	Osmanthus fragrans	3	18	1
March	Turdus merula	Osmanthus fragrans	3	35	4
March	Ixos mcclellandii	Osmanthus fragrans	2	14	2
March	Pycnonotus xanthorrhous	Schefflera arboricola	1	2	1
March	Hemixos castanonotus	Osmanthus fragrans	1	13	1
March	Zosterops japonicus	Osmanthus fragrans	2	24	2
March	Pycnonotus xanthorrhous	Osmanthus fragrans	3	8	1
March	Pycnonotus sinensis	Osmanthus fragrans	2	5	1
March	Zosterops japonicus	Osmanthus fragrans	8	39	6
March	Zosterops japonicus	Osmanthus fragrans	14	16	4
March	Pycnonotus sinensis	Schefflera arboricola	1	9	2
March	Zosterops japonicus	Osmanthus fragrans	9	57	8
March	Zosterops japonicus	Osmanthus fragrans	3	16	4
March	Zosterops japonicus	Osmanthus fragrans	11	19	5
March	Pycnonotus xanthorrhous	Osmanthus fragrans	7	38	3
March	Zosterops japonicus	Osmanthus fragrans	14	32	7
March	Zosterops japonicus	Osmanthus fragrans	6	24	5
March	Zosterops japonicus	Bischofia javanica	1	13	2
March	Pycnonotus xanthorrhous	Osmanthus fragrans	5	8	1
March	Turdus merula	Osmanthus fragrans	2	5	1
March	Zosterops japonicus	Schefflera arboricola	5	29	7
March	Zosterops japonicus	Osmanthus fragrans	2	21	4
March	Pycnonotus xanthorrhous	Osmanthus fragrans	4	36	2
March	Zosterops japonicus	Osmanthus fragrans	12	42	8
March	Pycnonotus xanthorrhous	Osmanthus fragrans	1	5	1
March	Pycnonotus sinensis	Osmanthus fragrans	3	13	1
March	Turdus merula	Osmanthus fragrans	2	7	1
March	Zosterops japonicus	Osmanthus fragrans	8	47	12
March	Pycnonotus xanthorrhous	Osmanthus fragrans	3	8	1
March	Ixos mcclellandii	Osmanthus fragrans	6	14	3
March	Pycnonotus xanthorrhous	Osmanthus fragrans	5	12	1
March	Zosterops japonicus	Osmanthus fragrans	7	26	5
March	Zosterops japonicus	Osmanthus fragrans	4	43	11
March	Turdus merula	Bischofia javanica	1	19	2
March	Turdus merula	Bischofia javanica	2	33	2
March	Turdus merula	Bischofia javanica	3	16	2
March	Zosterops japonicus	Osmanthus fragrans	2	53	13
March	Zosterops japonicus	Schefflera arboricola	2	26	2
March	Pycnonotus xanthorrhous	Osmanthus fragrans	7	11	1
March	Zosterops japonicus	Osmanthus fragrans	14	32	9
March	Zosterops japonicus	Osmanthus fragrans	6	25	7
March	Pycnonotus xanthorrhous	Osmanthus fragrans	2	13	1
March	Turdus merula	Osmanthus fragrans	3	7	1
March	Pycnonotus sinensis	Osmanthus fragrans	1	9	1
March	Pycnonotus xanthorrhous	Osmanthus fragrans	4	14	1
March	Zosterops japonicus	Osmanthus fragrans	17	56	13
March	Zosterops japonicus	Osmanthus fragrans	8	51	9
March	Pycnonotus xanthorrhous	Osmanthus fragrans	2	37	2
March	Zosterops japonicus	Osmanthus fragrans	3	24	6
March	Hemixos castanonotus	Osmanthus fragrans	6	31	2
March	Zosterops japonicus	Schefflera arboricola	1	28	3
March	Pycnonotus xanthorrhous	Osmanthus fragrans	7	25	2
March	Zosterops japonicus	Osmanthus fragrans	16	40	6
March	Pycnonotus sinensis	Osmanthus fragrans	3	9	1
March	Pycnonotus xanthorrhous	Osmanthus fragrans	5	12	1
March	Zosterops japonicus	Osmanthus fragrans	12	34	7
March	Pycnonotus xanthorrhous	Osmanthus fragrans	4	6	1
March	Hemixos castanonotus	Osmanthus fragrans	6	26	2
March	Ixos mcclellandii	Osmanthus fragrans	7	8	1
March	Zosterops japonicus	Osmanthus fragrans	9	52	6
March	Pycnonotus sinensis	Osmanthus fragrans	3	6	2
March	Pycnonotus xanthorrhous	Osmanthus fragrans	5	11	1
March	Zosterops japonicus	Osmanthus fragrans	8	35	8
March	Pycnonotus xanthorrhous	Schefflera arboricola	1	14	1
March	Zosterops japonicus	Schefflera arboricola	1	23	3
March	Zosterops japonicus	Osmanthus fragrans	5	37	7
March	Pycnonotus xanthorrhous	Osmanthus fragrans	6	9	1
March	Turdus merula	Osmanthus fragrans	3	45	3
March	Pycnonotus sinensis	Osmanthus fragrans	2	14	2
March	Pycnonotus jocosus	Osmanthus fragrans	1	6	1
March	Pycnonotus xanthorrhous	Osmanthus fragrans	6	13	2
March	Zosterops japonicus	Osmanthus fragrans	13	28	7
March	Zosterops japonicus	Osmanthus fragrans	6	21	4
March	Pycnonotus xanthorrhous	Osmanthus fragrans	4	7	1
March	Zosterops japonicus	Schefflera arboricola	3	29	6
March	Pycnonotus xanthorrhous	Schefflera arboricola	1	16	2
April	Turdus merula	Osmanthus fragrans	2	16	2
April	Zosterops japonicus	Osmanthus fragrans	9	27	9
April	Zosterops japonicus	Osmanthus fragrans	6	16	5
April	Pycnonotus xanthorrhous	Osmanthus fragrans	2	24	2
April	Zosterops japonicus	Osmanthus fragrans	7	32	7
April	Pycnonotus xanthorrhous	Osmanthus fragrans	6	63	3
April	Pycnonotus sinensis	Osmanthus fragrans	5	32	2
April	Pycnonotus sinensis	Osmanthus fragrans	11	18	2
April	Pycnonotus sinensis	Osmanthus fragrans	4	57	3
April	Pycnonotus xanthorrhous	Osmanthus fragrans	3	4	1
April	Zosterops japonicus	Osmanthus fragrans	8	39	7
April	Zosterops japonicus	Osmanthus fragrans	3	21	5
April	Pycnonotus xanthorrhous	Osmanthus fragrans	6	19	2
April	Pycnonotus sinensis	Osmanthus fragrans	5	32	2
April	Pycnonotus xanthorrhous	Osmanthus fragrans	5	14	1
April	Zosterops japonicus	Schefflera arboricola	2	9	2
April	Zosterops japonicus	Schefflera arboricola	1	16	3
April	Pycnonotus xanthorrhous	Osmanthus fragrans	4	24	2
April	Pycnonotus xanthorrhous	Osmanthus fragrans	8	14	1
April	Pycnonotus xanthorrhous	Osmanthus fragrans	3	31	2
April	Pycnonotus sinensis	Osmanthus fragrans	2	8	1
April	Zosterops japonicus	Osmanthus fragrans	11	57	12
April	Zosterops japonicus	Osmanthus fragrans	4	22	8
April	Zosterops japonicus	Osmanthus fragrans	7	35	11
April	Pycnonotus xanthorrhous	Osmanthus fragrans	2	23	2
April	Zosterops japonicus	Osmanthus fragrans	2	19	6
April	Pycnonotus xanthorrhous	Osmanthus fragrans	2	51	5
April	Hemixos castanonotus	Osmanthus fragrans	3	10	3
April	Zosterops japonicus	Osmanthus fragrans	8	64	6
April	Zosterops japonicus	Osmanthus fragrans	11	53	11
April	Pycnonotus jocosus	Osmanthus fragrans	3	4	1
April	Pycnonotus xanthorrhous	Osmanthus fragrans	5	48	3
April	Pycnonotus xanthorrhous	Osmanthus fragrans	4	13	1
April	Pycnonotus sinensis	Osmanthus fragrans	2	35	2
April	Pycnonotus xanthorrhous	Osmanthus fragrans	9	46	2
April	Pycnonotus xanthorrhous	Osmanthus fragrans	6	18	2
April	Zosterops japonicus	Osmanthus fragrans	16	62	8
April	Zosterops japonicus	Osmanthus fragrans	7	31	6
April	Zosterops japonicus	Osmanthus fragrans	8	52	3
April	Zosterops japonicus	Osmanthus fragrans	11	49	9
April	Pycnonotus xanthorrhous	Osmanthus fragrans	5	41	3
April	Hemixos castanonotus	Bischofia javanica	1	16	1
April	Pycnonotus xanthorrhous	Osmanthus fragrans	3	23	3
April	Zosterops japonicus	Osmanthus fragrans	11	22	9
April	Zosterops japonicus	Osmanthus fragrans	8	39	12
April	Zosterops japonicus	Osmanthus fragrans	4	26	7
April	Turdus merula	Osmanthus fragrans	2	15	3
April	Pycnonotus jocosus	Osmanthus fragrans	1	9	2
April	Pycnonotus xanthorrhous	Osmanthus fragrans	8	12	2
April	Pycnonotus xanthorrhous	Osmanthus fragrans	6	5	1
April	Pycnonotus xanthorrhous	Osmanthus fragrans	3	41	3
April	Pycnonotus sinensis	Bischofia javanica	2	14	2
April	Hemixos castanonotus	Osmanthus fragrans	4	17	3
April	Zosterops japonicus	Osmanthus fragrans	13	52	13
April	Zosterops japonicus	Schefflera arboricola	3	28	4
April	Zosterops japonicus	Osmanthus fragrans	5	32	17
April	Zosterops japonicus	Osmanthus fragrans	11	15	6
April	Pycnonotus xanthorrhous	Osmanthus fragrans	6	31	3
April	Pycnonotus sinensis	Osmanthus fragrans	4	14	2
April	Turdus merula	Osmanthus fragrans	2	6	3
April	Turdus merula	Osmanthus fragrans	3	2	1
April	Turdus merula	Osmanthus fragrans	4	8	3
April	Turdus merula	Osmanthus fragrans	5	6	1
April	Turdus merula	Osmanthus fragrans	6	6	1
April	Pycnonotus xanthorrhous	Osmanthus fragrans	5	11	1
April	Pycnonotus xanthorrhous	Osmanthus fragrans	7	24	2
April	Zosterops japonicus	Osmanthus fragrans	12	12	5
April	Zosterops japonicus	Osmanthus fragrans	17	27	11
April	Ixos mcclellandii	Osmanthus fragrans	6	30	2
April	Pycnonotus jocosus	Osmanthus fragrans	5	16	2
April	Pycnonotus xanthorrhous	Osmanthus fragrans	4	24	2
April	Pycnonotus xanthorrhous	Osmanthus fragrans	8	5	1
April	Pycnonotus sinensis	Osmanthus fragrans	5	11	2
April	Pycnonotus xanthorrhous	Osmanthus fragrans	3	27	3
April	Zosterops japonicus	Osmanthus fragrans	17	45	7
April	Zosterops japonicus	Osmanthus fragrans	9	22	3
April	Zosterops japonicus	Osmanthus fragrans	12	53	10
April	Turdus merula	Osmanthus fragrans	4	16	3
April	Hemixos castanonotus	Osmanthus fragrans	6	13	2
April	Pycnonotus xanthorrhous	Osmanthus fragrans	5	4	1
April	Pycnonotus xanthorrhous	Osmanthus fragrans	7	27	4
April	Pycnonotus xanthorrhous	Schefflera arboricola	1	51	5
April	Pycnonotus xanthorrhous	Osmanthus fragrans	9	23	6
April	Zosterops japonicus	Osmanthus fragrans	6	14	5
April	Pycnonotus sinensis	Osmanthus fragrans	3	21	3
April	Zosterops japonicus	Bischofia javanica	4	36	7
April	Pycnonotus xanthorrhous	Osmanthus fragrans	5	5	4
April	Zosterops japonicus	Osmanthus fragrans	7	18	11
April	Zosterops japonicus	Osmanthus fragrans	14	29	16
April	Pycnonotus xanthorrhous	Osmanthus fragrans	8	14	2
April	Pycnonotus sinensis	Osmanthus fragrans	3	6	1
April	Pycnonotus sinensis	Osmanthus fragrans	6	21	2
April	Hemixos castanonotus	Osmanthus fragrans	5	27	4
April	Pycnonotus xanthorrhous	Osmanthus fragrans	7	33	3
April	Pycnonotus xanthorrhous	Osmanthus fragrans	11	15	2
April	Pycnonotus xanthorrhous	Osmanthus fragrans	4	24	2
April	Turdus merula	Osmanthus fragrans	3	31	4
April	Pycnonotus sinensis	Osmanthus fragrans	5	17	2
April	Pycnonotus sinensis	Osmanthus fragrans	7	6	1
April	Pycnonotus xanthorrhous	Osmanthus fragrans	12	22	3
April	Zosterops japonicus	Osmanthus fragrans	16	26	7
April	Zosterops japonicus	Osmanthus fragrans	10	38	12
April	Zosterops japonicus	Osmanthus fragrans	7	23	6
April	Pycnonotus xanthorrhous	Osmanthus fragrans	6	19	3
April	Pycnonotus sinensis	Osmanthus fragrans	3	14	2
April	Pycnonotus xanthorrhous	Osmanthus fragrans	5	31	2
April	Turdus merula	Osmanthus fragrans	2	27	2
April	Hemixos castanonotus	Osmanthus fragrans	6	19	3
April	Zosterops japonicus	Osmanthus fragrans	8	27	12
April	Pycnonotus jocosus	Osmanthus fragrans	6	12	2
April	Pycnonotus xanthorrhous	Osmanthus fragrans	7	9	2
April	Pycnonotus xanthorrhous	Osmanthus fragrans	4	11	1
April	Pycnonotus xanthorrhous	Osmanthus fragrans	3	16	3
April	Zosterops japonicus	Osmanthus fragrans	6	53	21
April	Zosterops japonicus	Osmanthus fragrans	9	37	16
April	Pycnonotus sinensis	Osmanthus fragrans	3	24	3
April	Zosterops japonicus	Osmanthus fragrans	11	26	11
April	Zosterops japonicus	Osmanthus fragrans	4	11	7
April	Turdus merula	Osmanthus fragrans	2	29	5
April	Pycnonotus xanthorrhous	Osmanthus fragrans	4	21	2
April	Pycnonotus xanthorrhous	Osmanthus fragrans	8	54	3
April	Turdus merula	Osmanthus fragrans	5	13	2
April	Ixos mcclellandii	Osmanthus fragrans	6	24	5
May	Pycnonotus xanthorrhous	Machilus nanmu	8	22	2
May	Hemixos castanonotus	Machilus nanmu	3	37	3
May	Zosterops japonicus	Machilus nanmu	11	24	2
May	Pycnonotus sinensis	Machilus nanmu	4	19	2
May	Hemixos castanonotus	Machilus nanmu	5	11	1
May	Pycnonotus xanthorrhous	Machilus nanmu	6	41	4
May	Pycnonotus xanthorrhous	Machilus nanmu	7	22	2
May	Ixos mcclellandii	Machilus nanmu	4	14	2
May	Parus major	Machilus nanmu	4	17	1
May	Pycnonotus sinensis	Machilus nanmu	6	36	3
May	Pycnonotus xanthorrhous	Machilus nanmu	3	29	4
May	Pycnonotus xanthorrhous	Machilus nanmu	2	53	6
May	Hemixos castanonotus	Machilus nanmu	3	20	2
May	Parus major	Machilus nanmu	7	14	2
May	Pycnonotus sinensis	Machilus nanmu	5	27	2
May	Pycnonotus xanthorrhous	Machilus nanmu	4	6	1
May	Ixos mcclellandii	Machilus nanmu	8	12	2
May	Hemixos castanonotus	Machilus nanmu	5	15	2
May	Pycnonotus xanthorrhous	Machilus nanmu	8	7	1
May	Pycnonotus xanthorrhous	Machilus nanmu	5	11	2
May	Pycnonotus xanthorrhous	Machilus nanmu	2	28	3
May	Zosterops japonicus	Machilus nanmu	9	16	2
May	Hemixos castanonotus	Machilus nanmu	2	37	2
May	Pycnonotus xanthorrhous	Machilus nanmu	3	46	4
May	Pycnonotus xanthorrhous	Machilus nanmu	7	22	2
May	Zosterops japonicus	Machilus nanmu	6	31	3
May	Zosterops japonicus	Machilus nanmu	3	10	1
May	Pycnonotus sinensis	Machilus nanmu	4	17	2
May	Pycnonotus xanthorrhous	Bischofia javanica	7	32	2
May	Hemixos castanonotus	Bischofia javanica	5	11	1
May	Parus major	Bischofia javanica	6	16	1
May	Pycnonotus xanthorrhous	Machilus nanmu	8	24	2
May	Hemixos castanonotus	Machilus nanmu	4	22	2
May	Pycnonotus sinensis	Machilus nanmu	2	17	1
May	Pycnonotus sinensis	Machilus nanmu	3	36	3
May	Pycnonotus xanthorrhous	Machilus nanmu	5	15	2
May	Pycnonotus xanthorrhous	Machilus nanmu	2	28	4
May	Pycnonotus xanthorrhous	Machilus nanmu	4	34	2
May	Ixos mcclellandii	Machilus nanmu	4	21	3
May	Hemixos castanonotus	Machilus nanmu	6	49	4
May	Zosterops japonicus	Machilus nanmu	11	16	2
May	Ixos mcclellandii	Machilus nanmu	7	22	2
May	Pycnonotus xanthorrhous	Machilus nanmu	5	11	2
May	Parus major	Machilus nanmu	2	17	1
May	Pycnonotus xanthorrhous	Machilus nanmu	6	13	1
May	Zosterops japonicus	Machilus nanmu	6	27	3
May	Pycnonotus xanthorrhous	Machilus nanmu	2	18	2
May	Pycnonotus xanthorrhous	Machilus nanmu	5	34	3
May	Zosterops japonicus	Machilus nanmu	4	21	2
May	Pycnonotus xanthorrhous	Machilus nanmu	5	62	5
May	Pycnonotus xanthorrhous	Machilus nanmu	7	14	2
May	Pycnonotus sinensis	Machilus nanmu	3	31	3
May	Pycnonotus xanthorrhous	Machilus nanmu	11	24	4
May	Pycnonotus xanthorrhous	Machilus nanmu	8	7	1
May	Zosterops japonicus	Machilus nanmu	9	11	2
May	Pycnonotus sinensis	Machilus nanmu	6	29	3
May	Hemixos castanonotus	Machilus nanmu	5	15	2
May	Hemixos castanonotus	Machilus nanmu	1	5	1
May	Hemixos castanonotus	Machilus nanmu	2	21	2
May	Pycnonotus sinensis	Machilus nanmu	3	26	2
May	Pycnonotus xanthorrhous	Machilus nanmu	7	14	2
May	Pycnonotus xanthorrhous	Machilus nanmu	2	20	3
May	Parus major	Machilus nanmu	5	17	2
May	Pycnonotus sinensis	Machilus nanmu	3	34	2
May	Pycnonotus xanthorrhous	Machilus nanmu	5	51	5
May	Zosterops japonicus	Machilus nanmu	6	21	2
May	Zosterops japonicus	Machilus nanmu	7	39	3
May	Hemixos castanonotus	Machilus nanmu	4	18	2
May	Pycnonotus xanthorrhous	Machilus nanmu	6	37	6
May	Ixos mcclellandii	Machilus nanmu	2	21	2
May	Zosterops japonicus	Machilus nanmu	3	15	1
May	Pycnonotus xanthorrhous	Machilus nanmu	4	12	2
May	Pycnonotus xanthorrhous	Machilus nanmu	7	26	3
May	Parus major	Machilus nanmu	5	24	2
May	Pycnonotus xanthorrhous	Machilus nanmu	6	58	4
May	Pycnonotus xanthorrhous	Machilus nanmu	1	16	2
May	Hemixos castanonotus	Machilus nanmu	2	33	3
June	Pycnonotus xanthorrhous	Machilus nanmu	7	34	3
June	Hemixos castanonotus	Machilus nanmu	6	27	2
June	Pycnonotus xanthorrhous	Machilus nanmu	3	6	1
June	Pycnonotus xanthorrhous	Machilus nanmu	7	5	1
June	Pycnonotus xanthorrhous	Machilus nanmu	5	13	2
June	Parus major	Machilus nanmu	4	21	2
June	Zosterops japonicus	Machilus nanmu	5	7	1
June	Zosterops japonicus	Machilus nanmu	9	16	2
June	Pycnonotus sinensis	Machilus nanmu	5	33	3
June	Pycnonotus sinensis	Machilus nanmu	3	24	2
June	Pycnonotus xanthorrhous	Machilus nanmu	9	11	1
June	Hemixos castanonotus	Machilus nanmu	3	56	5
June	Zosterops japonicus	Machilus nanmu	6	23	2
June	Parus major	Machilus nanmu	3	12	1
June	Pycnonotus xanthorrhous	Machilus nanmu	11	16	2
June	Pycnonotus xanthorrhous	Alocasia macrorrhiza	5	37	3
June	Hemixos castanonotus	Machilus nanmu	4	49	5
June	Pycnonotus xanthorrhous	Machilus nanmu	8	3	1
June	Pycnonotus sinensis	Machilus nanmu	3	14	2
June	Hemixos castanonotus	Machilus nanmu	7	22	3
June	Zosterops japonicus	Machilus nanmu	6	16	2
June	Parus major	Machilus nanmu	5	10	1
June	Pycnonotus xanthorrhous	Machilus nanmu	6	24	2
June	Pycnonotus xanthorrhous	Machilus nanmu	2	13	1
June	Pycnonotus xanthorrhous	Machilus nanmu	3	35	3
June	Pycnonotus xanthorrhous	Machilus nanmu	7	9	1
June	Pycnonotus xanthorrhous	Machilus nanmu	5	21	2
June	Hemixos castanonotus	Machilus nanmu	8	5	1
June	Ixos mcclellandii	Machilus nanmu	2	31	3
June	Pycnonotus xanthorrhous	Machilus nanmu	4	7	1
June	Hemixos castanonotus	Machilus nanmu	7	27	2
June	Pycnonotus xanthorrhous	Alocasia macrorrhiza	3	11	1
June	Pycnonotus sinensis	Viburnum odoratissimum	6	32	2
June	Hemixos castanonotus	Machilus nanmu	4	39	3
June	Pycnonotus xanthorrhous	Machilus nanmu	8	21	2
June	Hemixos castanonotus	Machilus nanmu	5	16	2
June	Pycnonotus xanthorrhous	Machilus nanmu	5	34	2
June	Pycnonotus xanthorrhous	Machilus nanmu	9	5	1
June	Hemixos castanonotus	Machilus nanmu	3	42	3
June	Zosterops japonicus	Machilus nanmu	7	22	2
June	Hemixos castanonotus	Machilus nanmu	2	17	2
June	Pycnonotus xanthorrhous	Machilus nanmu	5	19	2
June	Pycnonotus xanthorrhous	Machilus nanmu	2	6	1
June	Pycnonotus sinensis	Machilus nanmu	8	9	2
June	Ixos mcclellandii	Machilus nanmu	7	26	2
June	Pycnonotus xanthorrhous	Machilus nanmu	2	14	2
June	Pycnonotus xanthorrhous	Alocasia macrorrhiza	8	7	1
June	Hemixos castanonotus	Machilus nanmu	6	28	2
June	Pycnonotus xanthorrhous	Alocasia macrorrhiza	4	33	2
June	Ixos mcclellandii	Machilus nanmu	5	10	1
June	Pycnonotus xanthorrhous	Machilus nanmu	3	43	2
June	Pycnonotus xanthorrhous	Machilus nanmu	5	12	1
June	Zosterops japonicus	Machilus nanmu	2	46	3
June	Pycnonotus xanthorrhous	Machilus nanmu	9	37	2
June	Hemixos castanonotus	Machilus nanmu	5	45	3
June	Ixos mcclellandii	Machilus nanmu	3	21	2
June	Pycnonotus sinensis	Machilus nanmu	4	29	2
June	Pycnonotus xanthorrhous	Alocasia macrorrhiza	2	12	1
June	Pycnonotus sinensis	Viburnum odoratissimum	5	6	1
June	Ixos mcclellandii	Alocasia macrorrhiza	7	13	2
June	Pycnonotus xanthorrhous	Alocasia macrorrhiza	5	5	1
June	Zosterops japonicus	Machilus nanmu	4	14	2
June	Zosterops japonicus	Machilus nanmu	3	27	3
June	Pycnonotus xanthorrhous	Alocasia macrorrhiza	2	33	2
June	Hemixos castanonotus	Machilus nanmu	3	21	2
June	Zosterops japonicus	Machilus nanmu	1	14	1
June	Pycnonotus xanthorrhous	Alocasia macrorrhiza	4	51	2
June	Pycnonotus xanthorrhous	Machilus nanmu	8	29	2
June	Parus major	Machilus nanmu	4	6	1
June	Pycnonotus sinensis	Machilus nanmu	3	15	1
June	Zosterops japonicus	Machilus nanmu	5	24	3
June	Hemixos castanonotus	Machilus nanmu	9	33	2
June	Ixos mcclellandii	Machilus nanmu	5	28	2
June	Ixos mcclellandii	Machilus nanmu	3	43	2
June	Pycnonotus xanthorrhous	Machilus nanmu	12	16	2
June	Ixos mcclellandii	Machilus nanmu	7	24	3
June	Zosterops japonicus	Machilus nanmu	6	38	2
June	Pycnonotus sinensis	Machilus nanmu	8	33	2
June	Ixos mcclellandii	Machilus nanmu	5	42	2
June	Hemixos castanonotus	Machilus nanmu	2	47	3
June	Pycnonotus xanthorrhous	Machilus nanmu	9	63	4
June	Zosterops japonicus	Machilus nanmu	3	28	2
June	Pycnonotus xanthorrhous	Alocasia macrorrhiza	5	47	5
June	Pycnonotus sinensis	Viburnum odoratissimum	2	36	2
July	Pycnonotus xanthorrhous	Machilus nanmu	3	21	2
July	Ixos mcclellandii	Machilus nanmu	5	62	4
July	Hemixos castanonotus	Machilus nanmu	6	7	2
July	Pycnonotus sinensis	Machilus nanmu	4	18	2
July	Zosterops japonicus	Machilus nanmu	7	5	1
July	Pycnonotus xanthorrhous	Alocasia macrorrhiza	8	11	5
July	Ixos mcclellandii	Alocasia macrorrhiza	2	9	6
July	Zosterops japonicus	Machilus nanmu	11	56	4
[truncated: 236 more rows]

## Sheet: Fruit and frugivore traits
	body mass	body length	bill width	wing length	wing loading							fruit mass	fruit length	fruit diameter	fruit volume	fruit colour
Pycnonotus xanthorrhous	34.25	194	14	87.75	0.195						Cayratia japonica	0.345	8.79	8.085	300.7	black
Zosterops japonicus	11	103.25	9.9	54	0.102						Cinnamomum camphora	0.341	9.22	8.73	367.74	black
Pycnonotus sinensis	34	186.75	14.25	86.75	0.196						Osmanthus fragrans	1.128	0.609	0.403	0.052	black
Hemixos castanonotus	39	206.5	17.75	99.75	0.195						Viburnum odoratissimum	0.099	6.835	5.06	91.58	red
Ixos mcclellandii	39	222.25	22.5	106.125	0.184						Machilus nanmu	0.124	6.835	6.56	153.93	red
Turdus merula	96.5	258	23.5	149	0.324						Ilex chinensis	0.297	9.235	7.155	247.42	red
Parus major	14.325	134.25	9.75	67.5	0.106						Magnolia grandiflora	0.105	6.805	5.95	126.08	red
Urocissa erythrorhyncha	176.75	580.75	34.5	191.75	0.461						Bischofia javanica	0.456	10.005	9.515	474.04	red
Parus venustulus	11.3	96	9.75	62.4	0.091						Rauvolfia verticillata	0.296	10.505	7.605	317.96	red
Copsychus saularis	40.5	201.5	17.75	95.5	0.212						Schefflera arboricola	0.087	5.94	5.565	96.27	black
Pycnonotus jocosus	34.25	193.25	13.5	87.75	0.195						Tetrastigma planicaule	4.786	21.355	19.35	4184.46	red
Turdus cardis	69.75	213.25	19.75	115.5	0.302						Ilex cornuta	0.503	10.03	9.695	493.37	red
Turdus hortulorum	61	215	18.5	116	0.263						Alocasia macrorrhiza	0.253	9.13	6.425	197.24	red
Streptopelia orientalis	243	314.75	17.75	193.75	0.627
